# Supplementary material
Source: PubMed Central journal article supplement (PMC7192218)

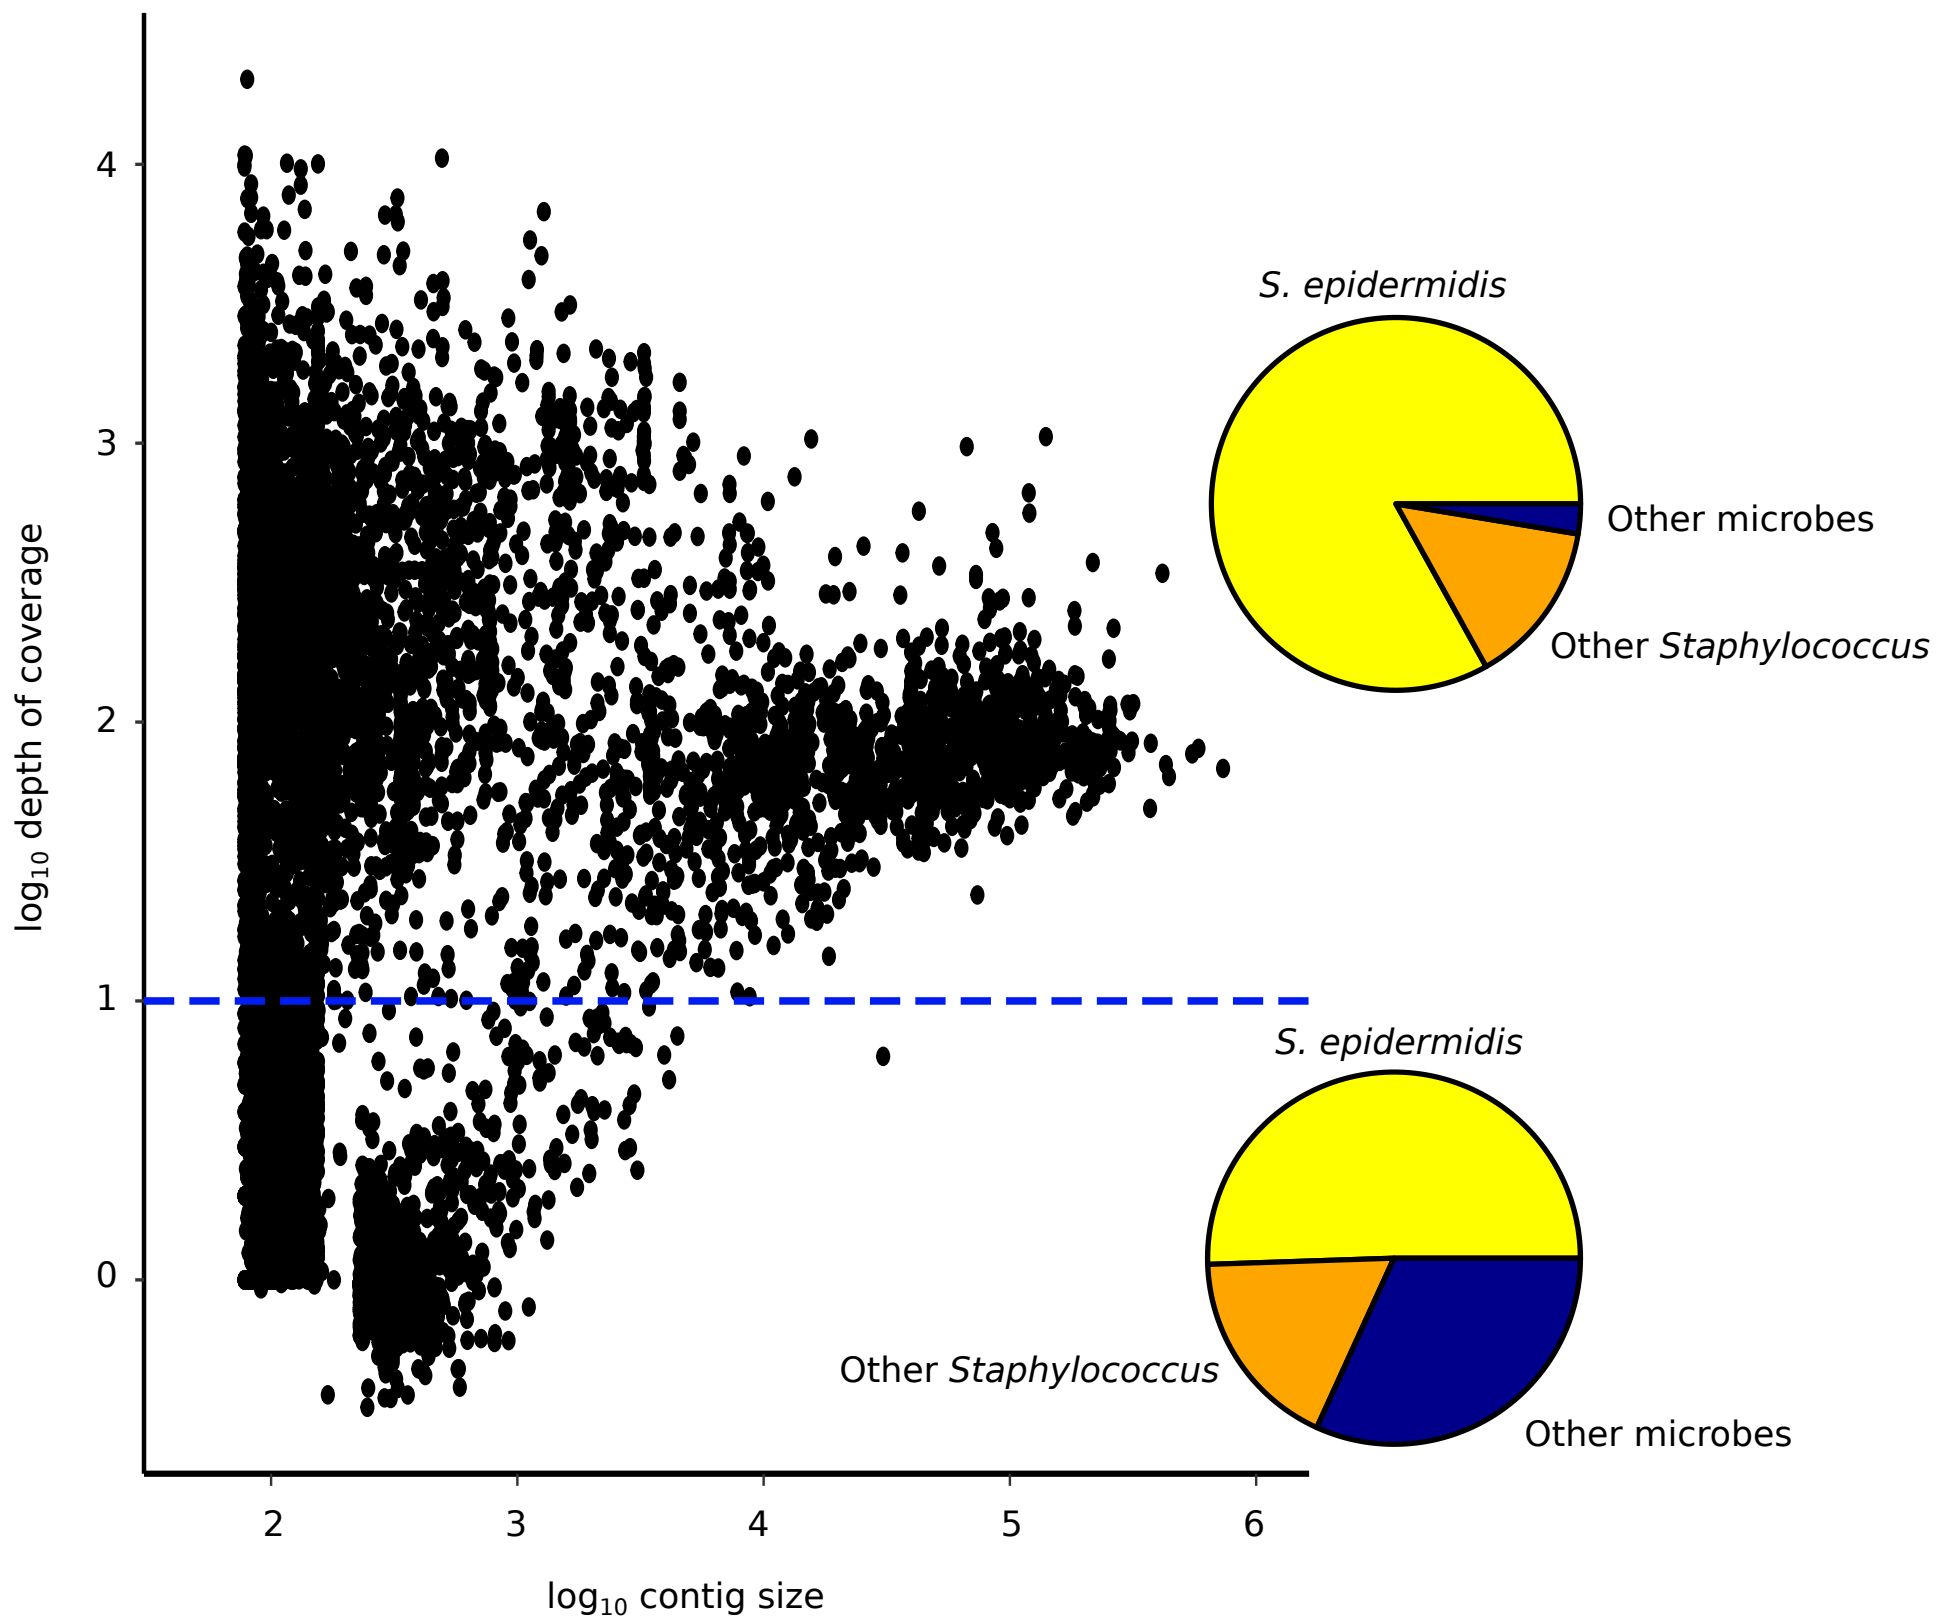

Supplement: NIHMS1569198-supplement-2.pdf [file NIHMS1569198-supplement-2.pdf]

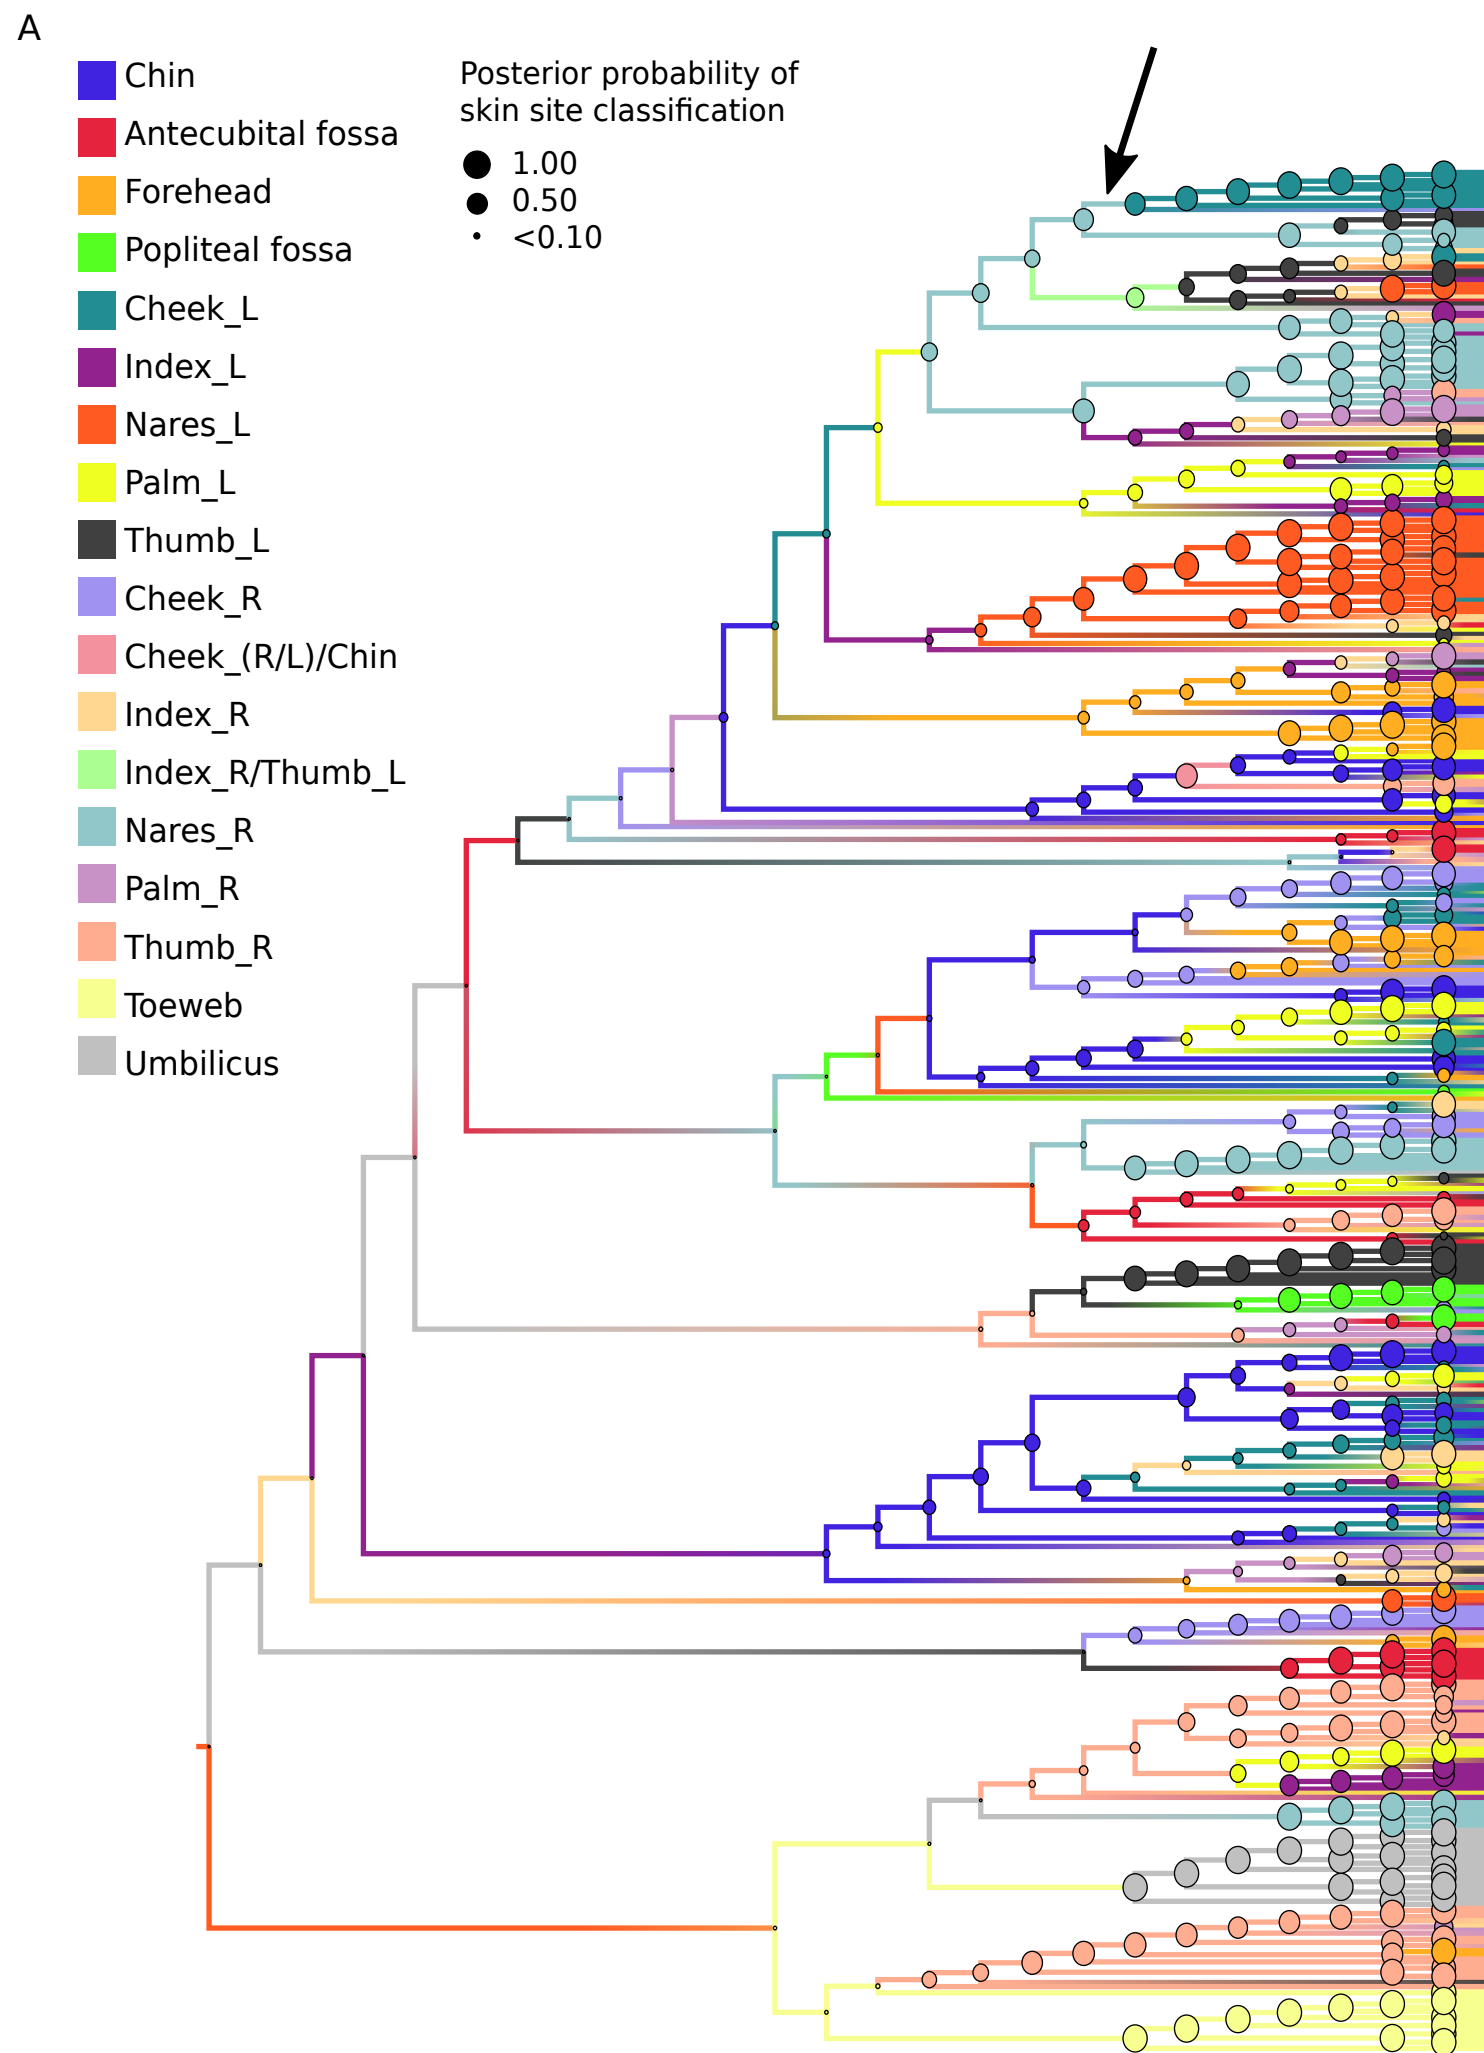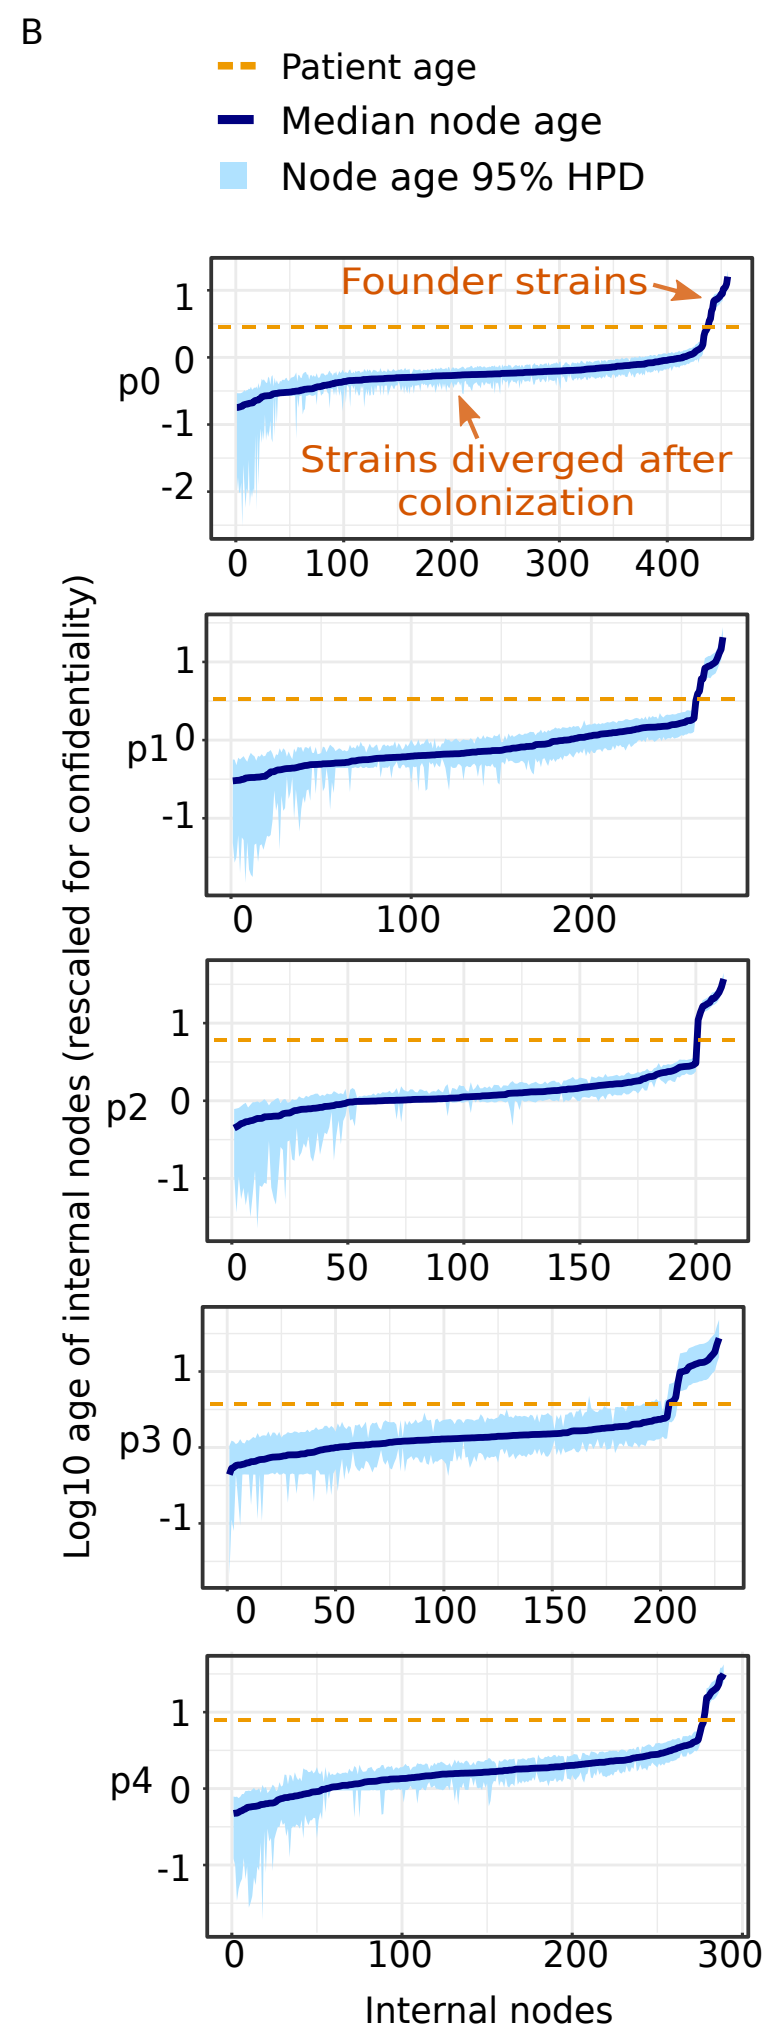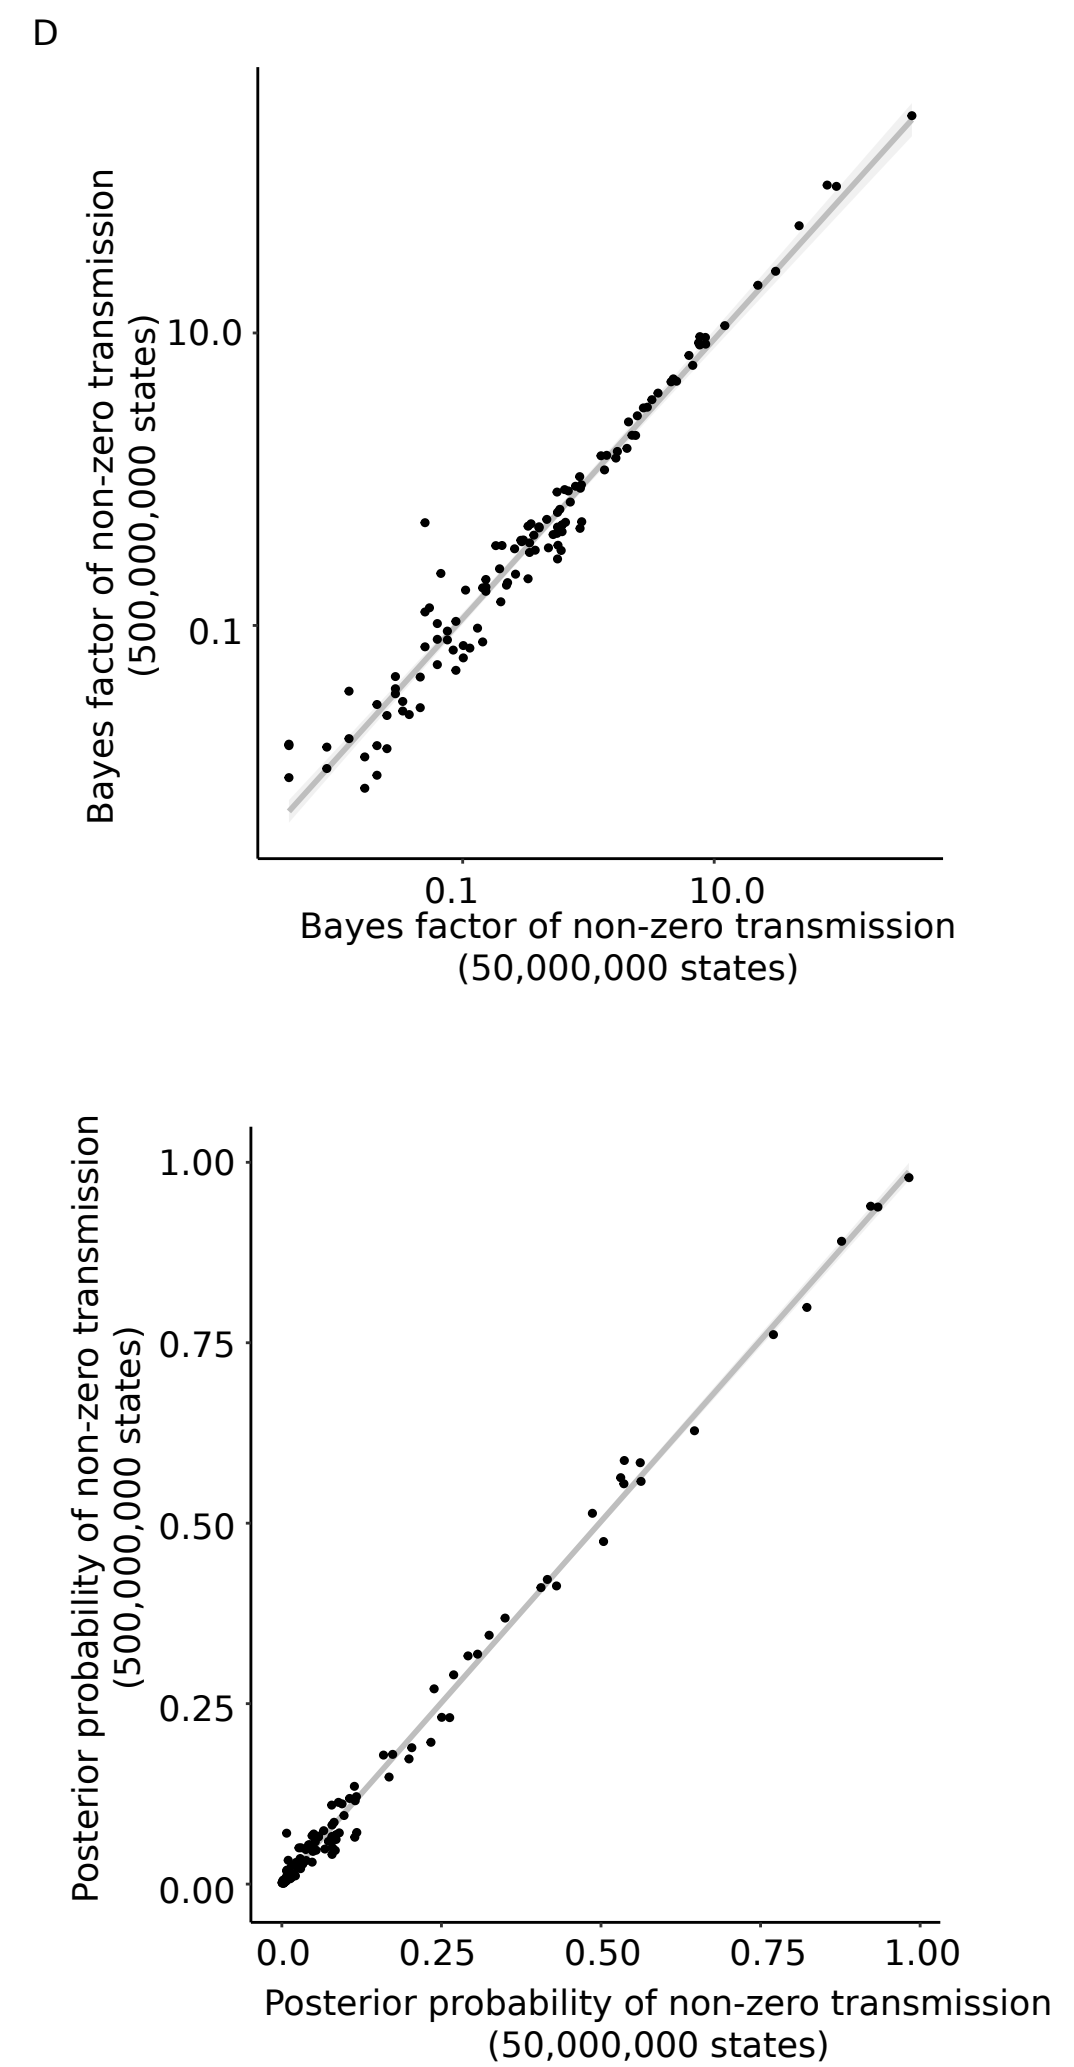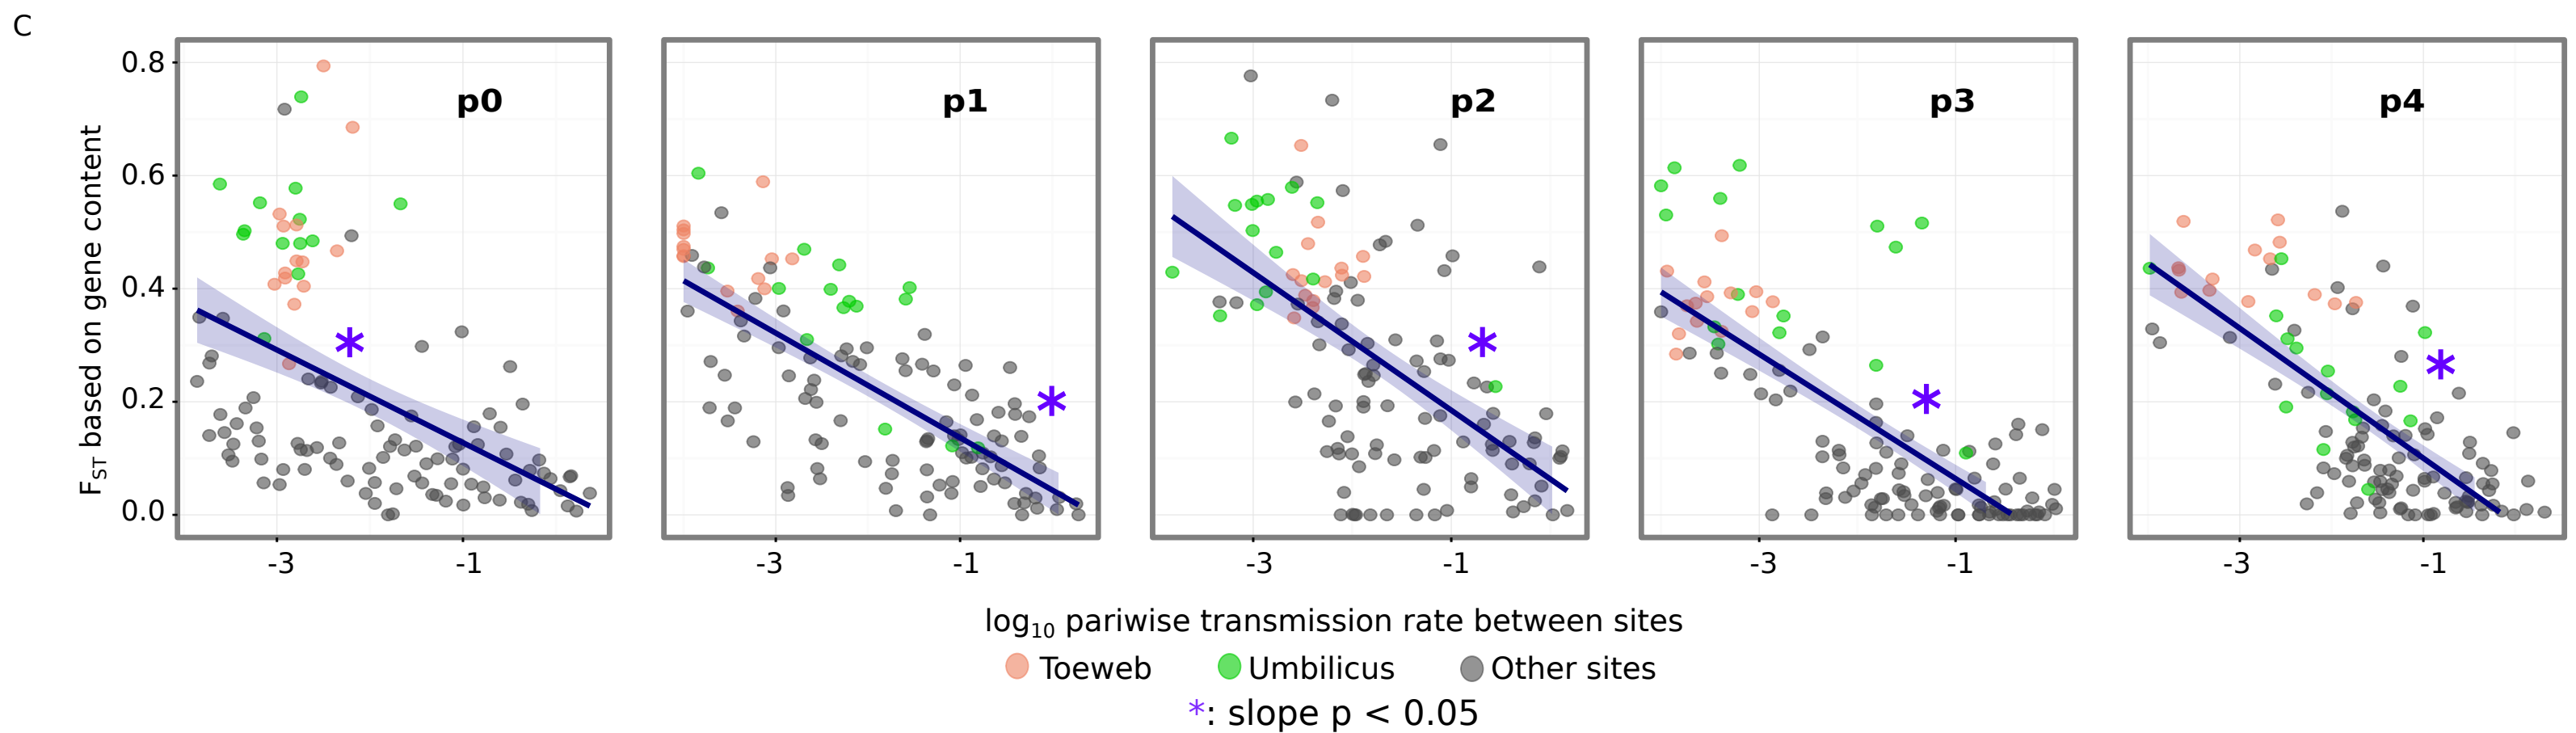

Supplement: NIHMS1569198-supplement-3.pdf [file NIHMS1569198-supplement-3.pdf]

A

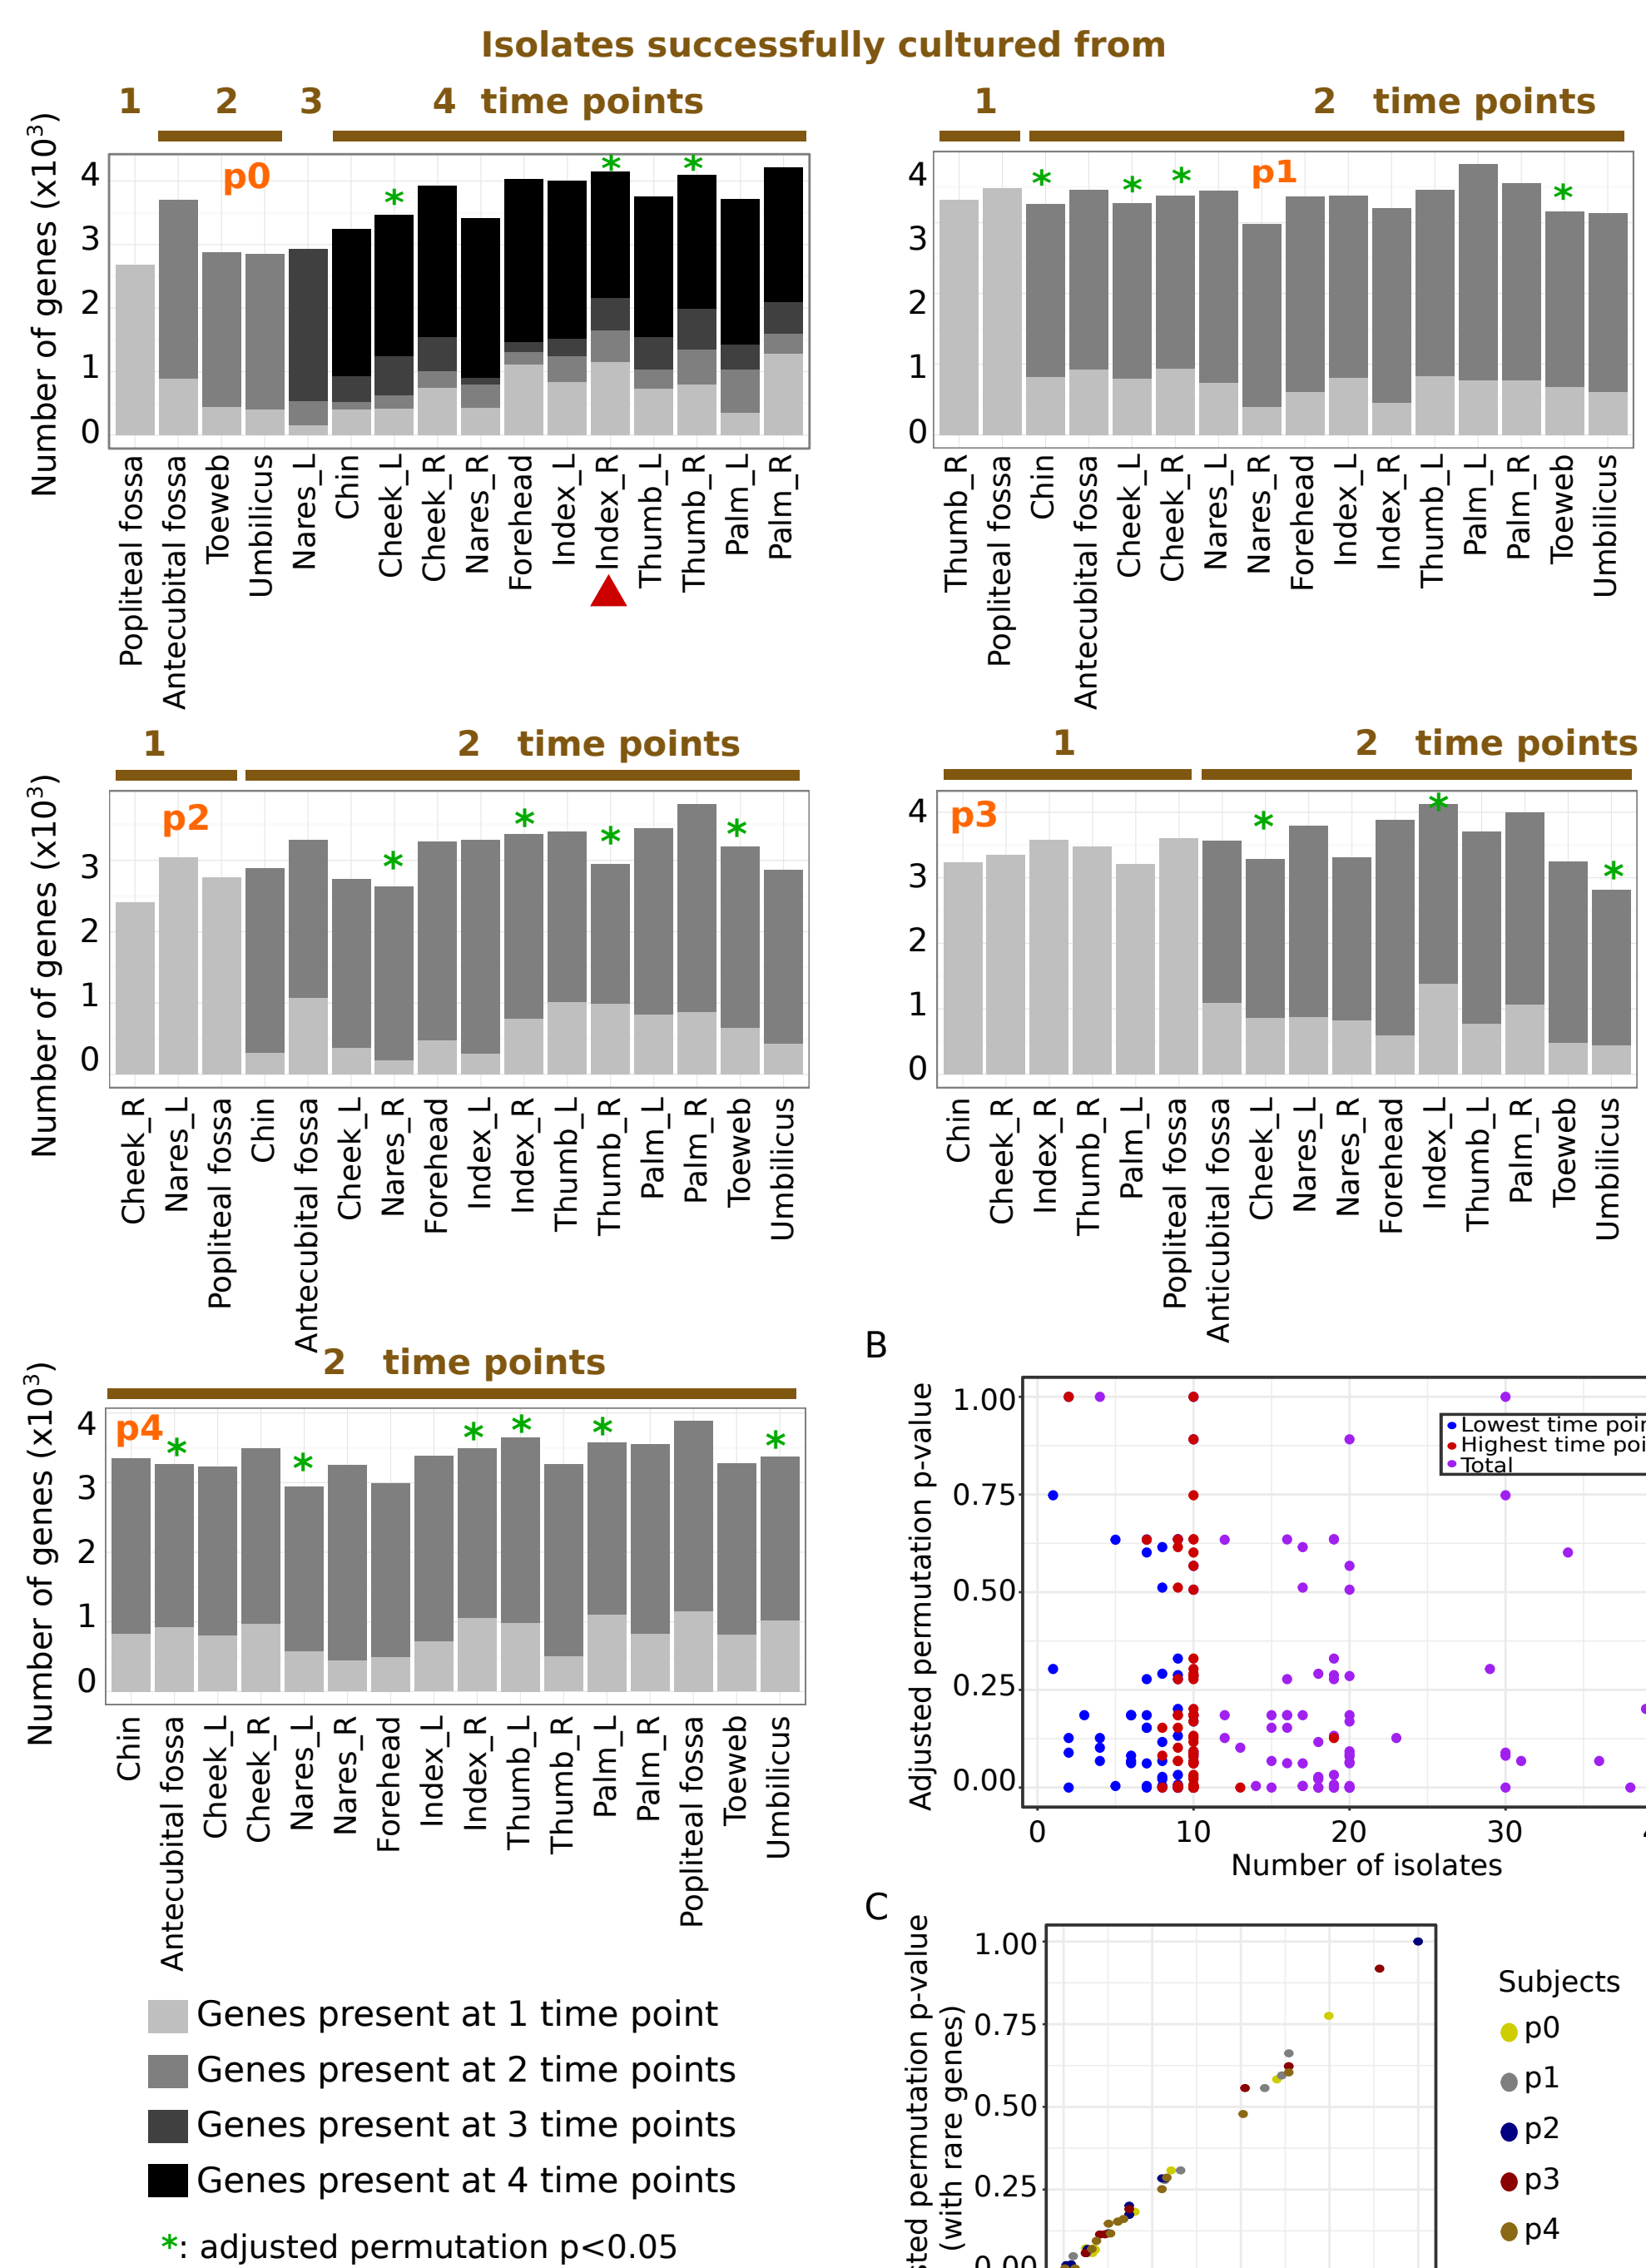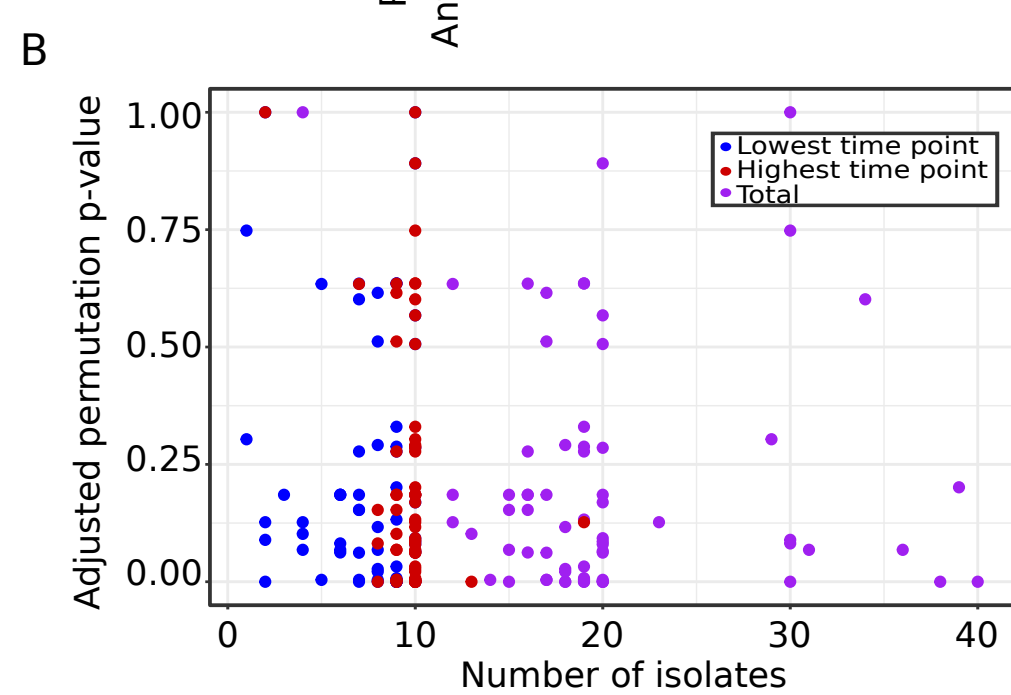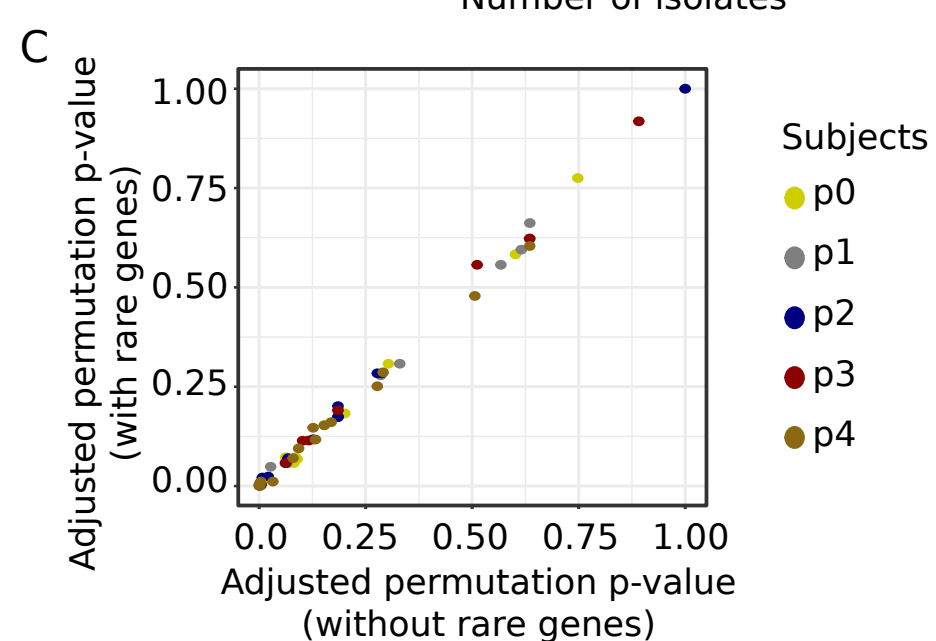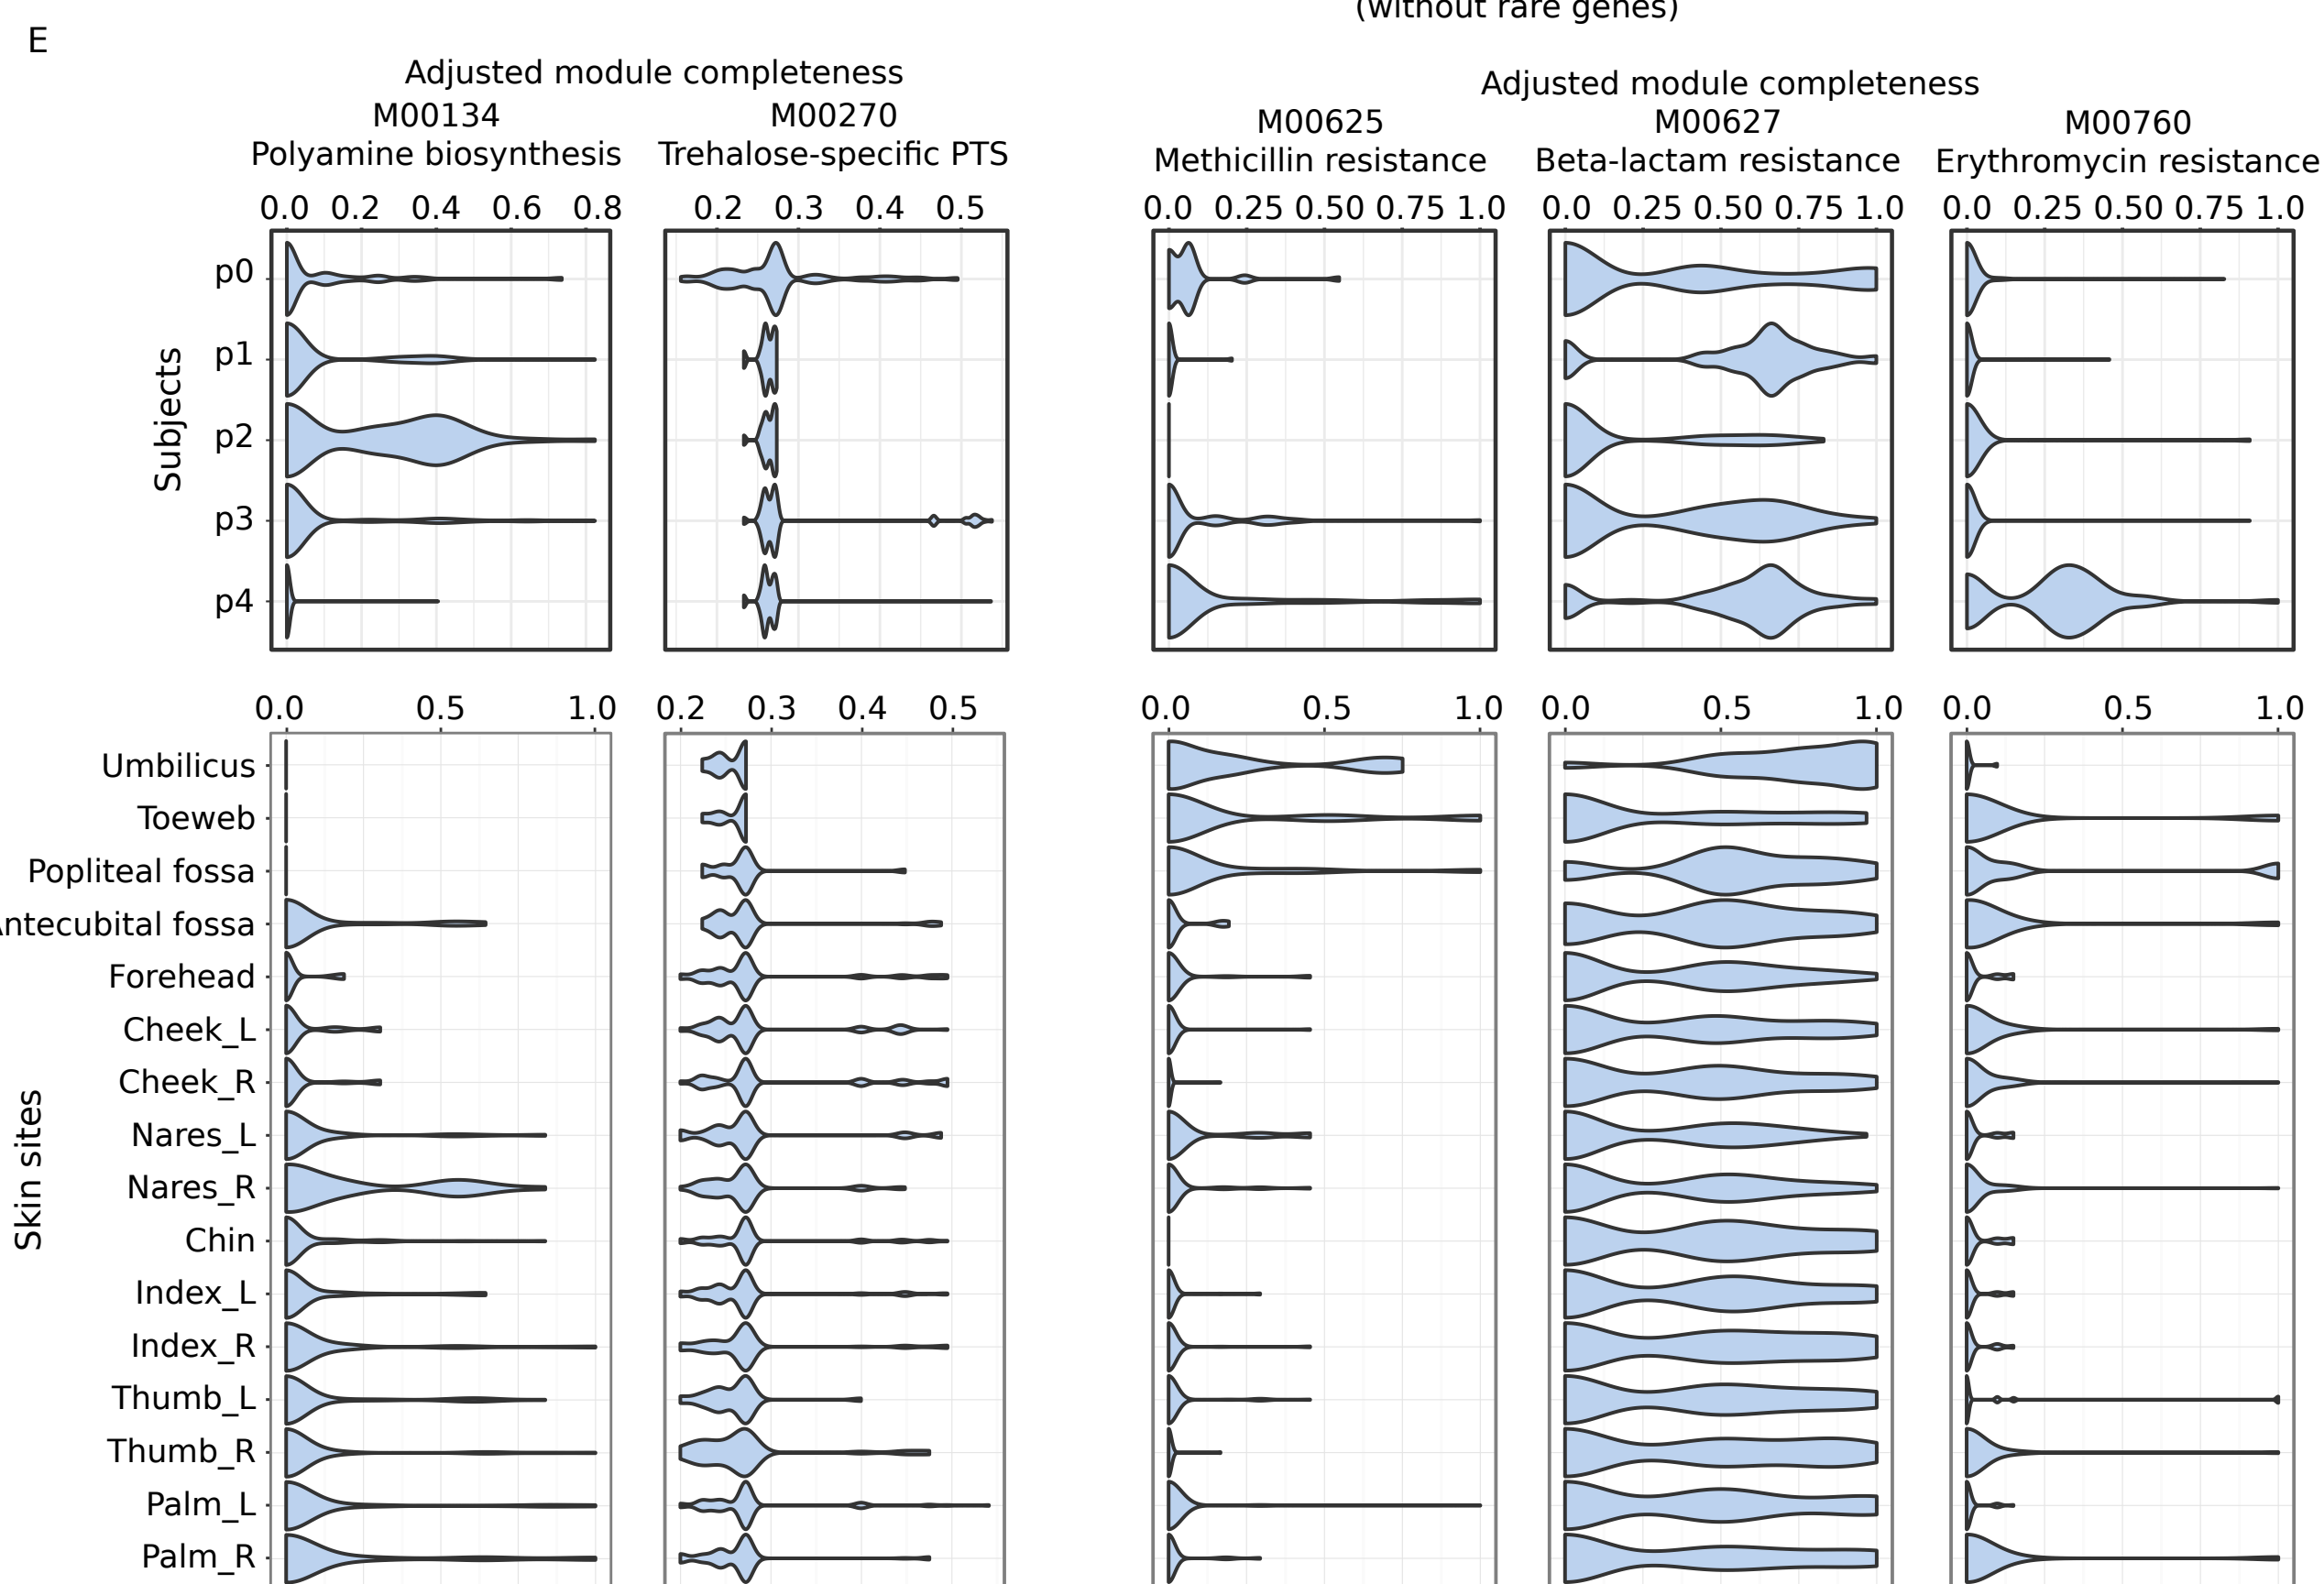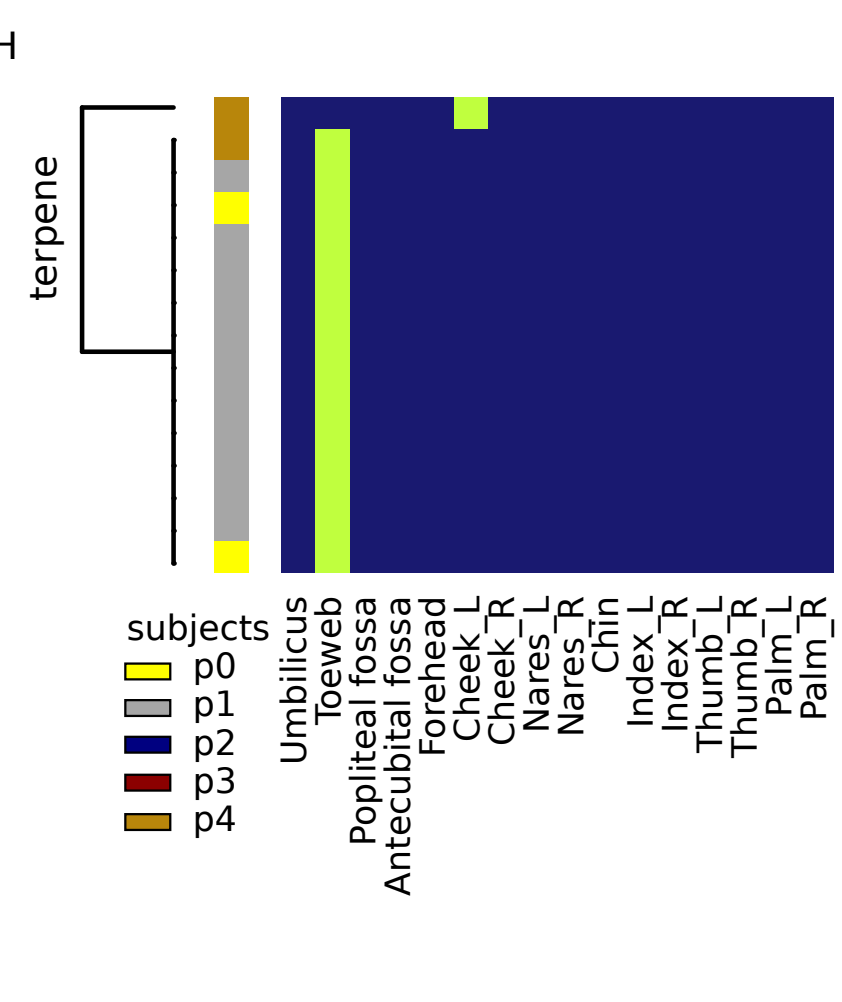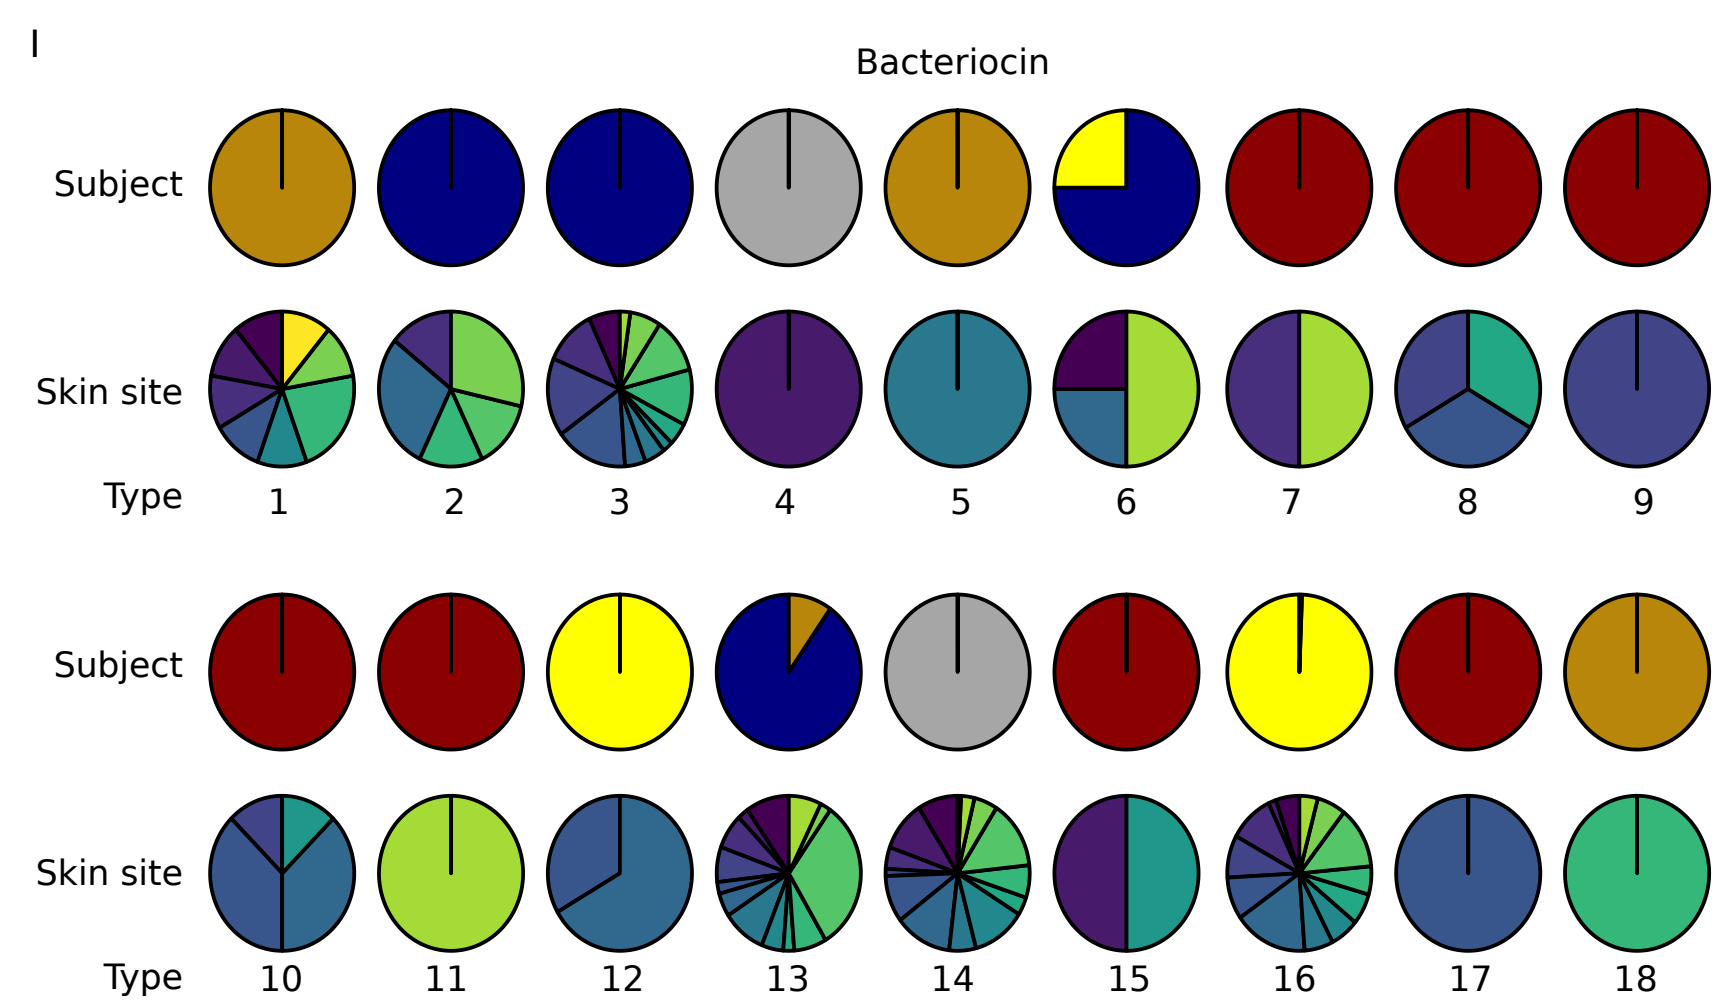

D

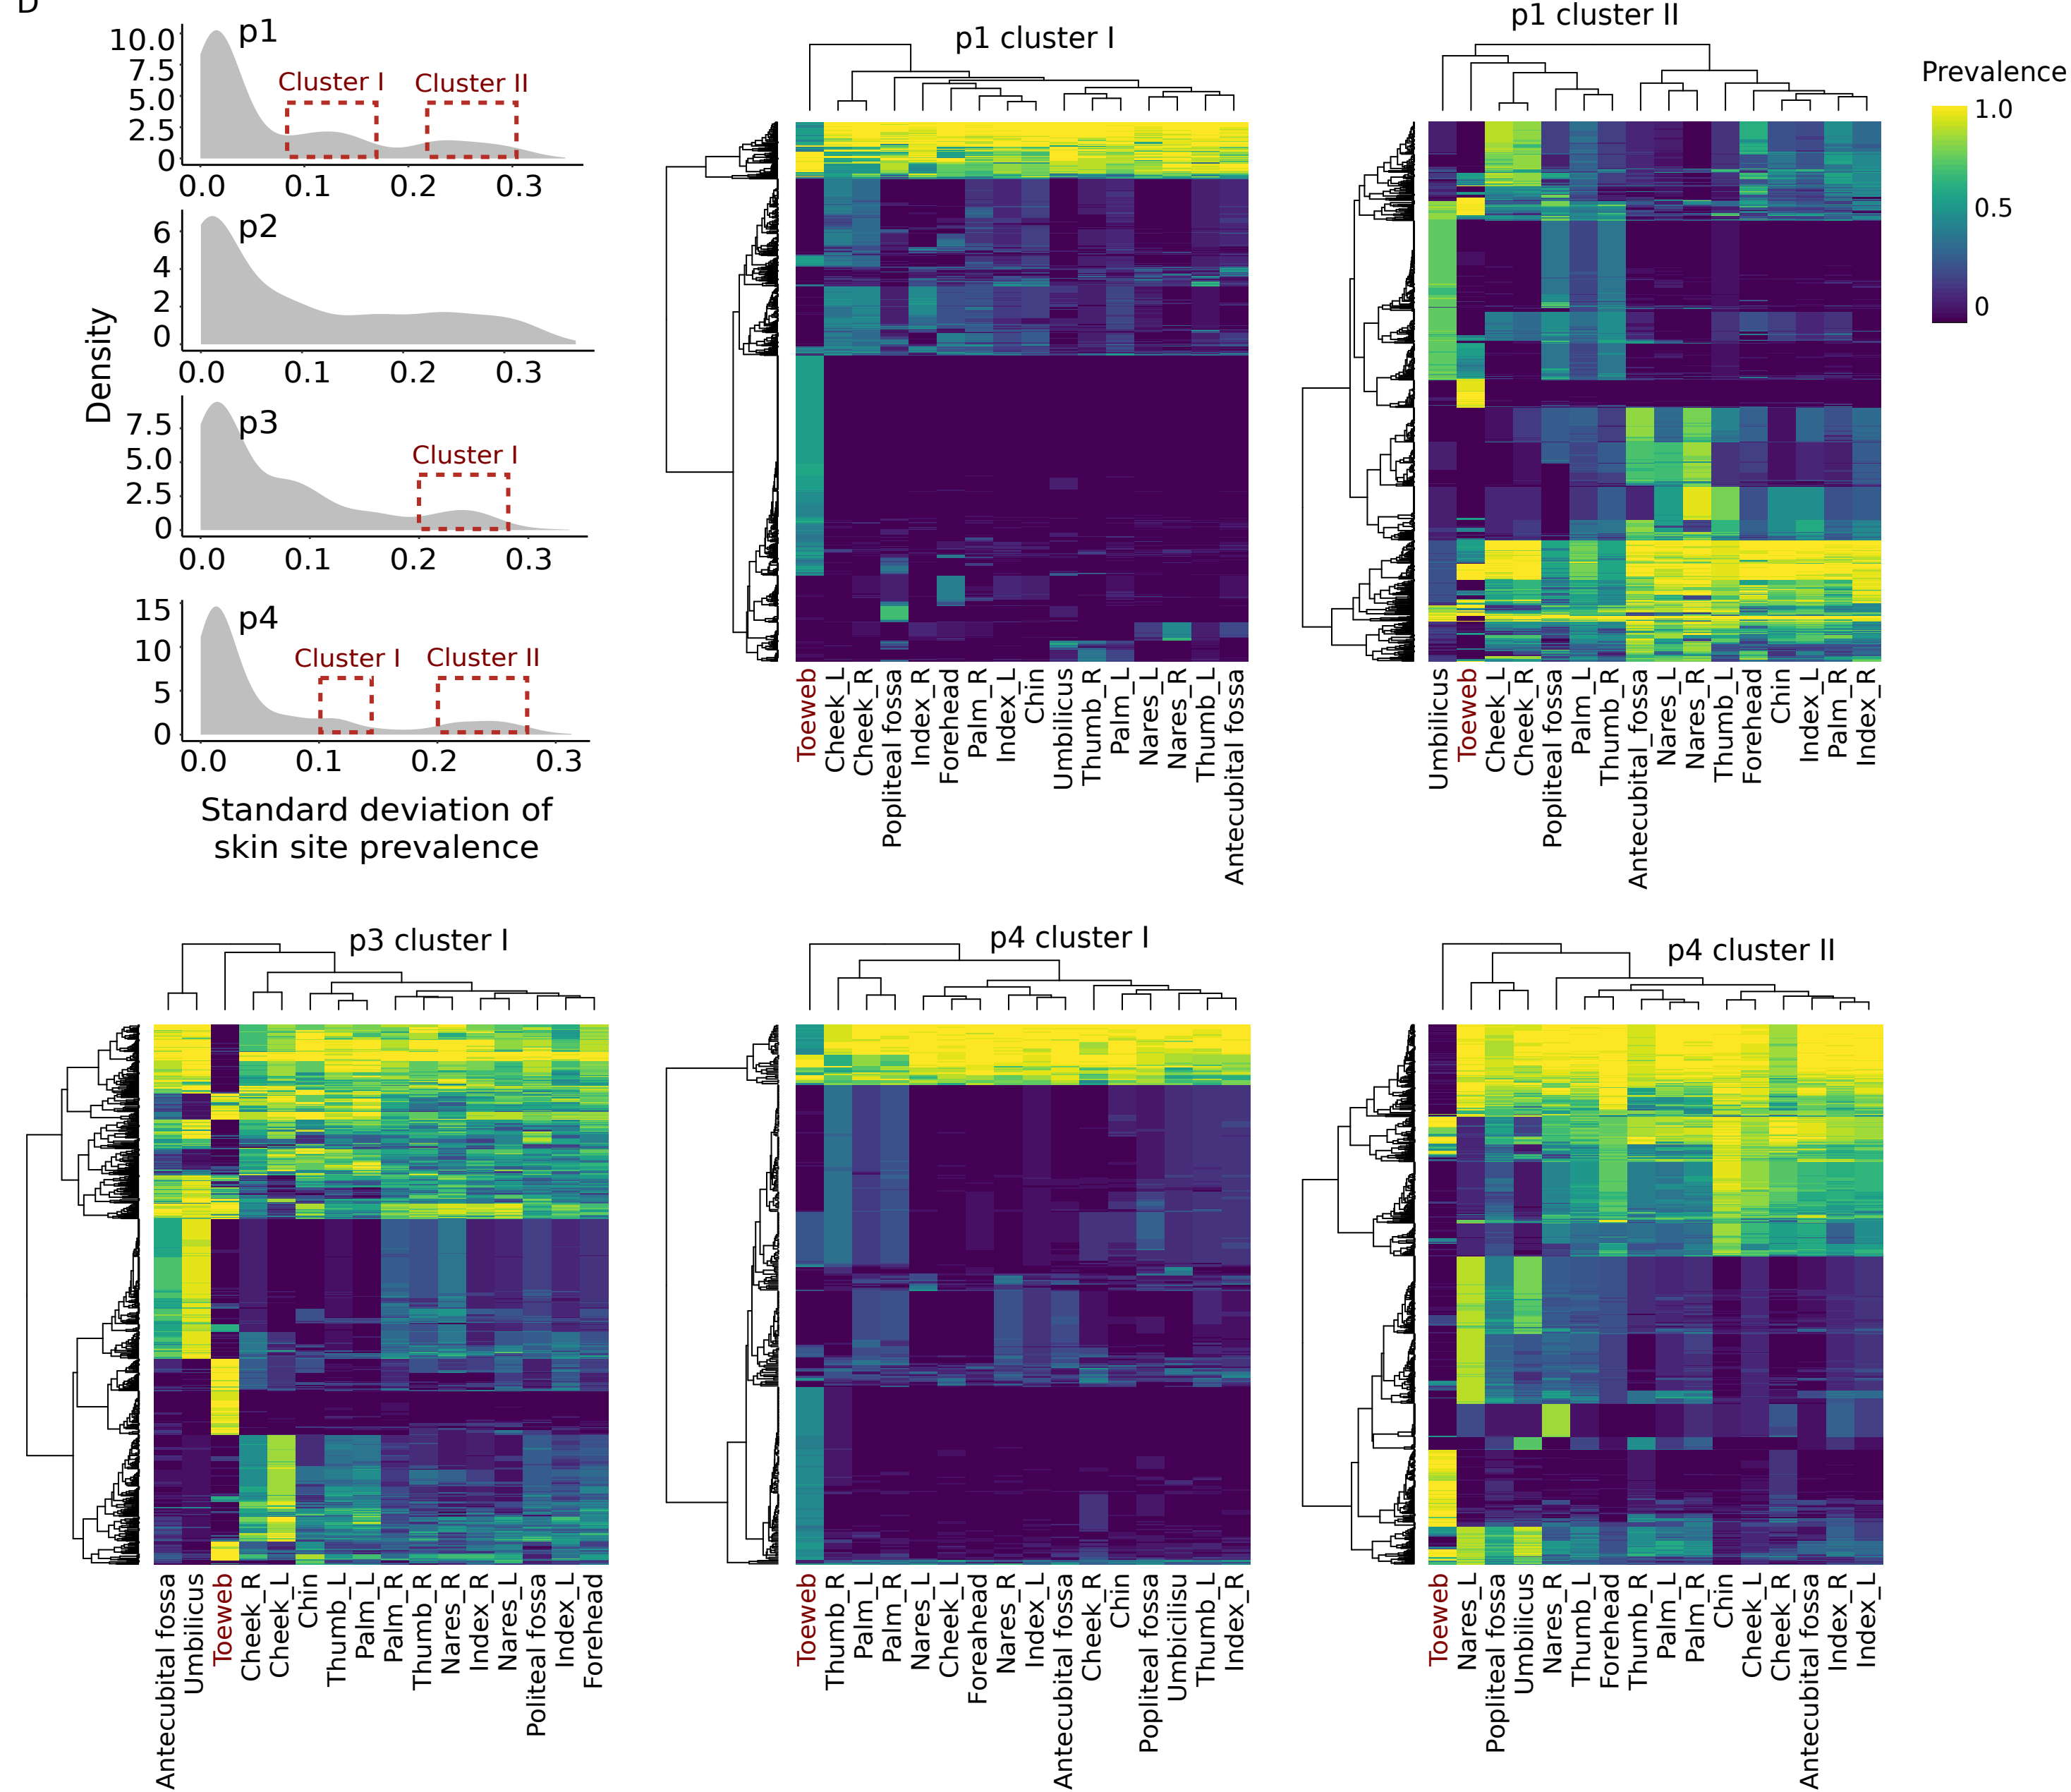

F

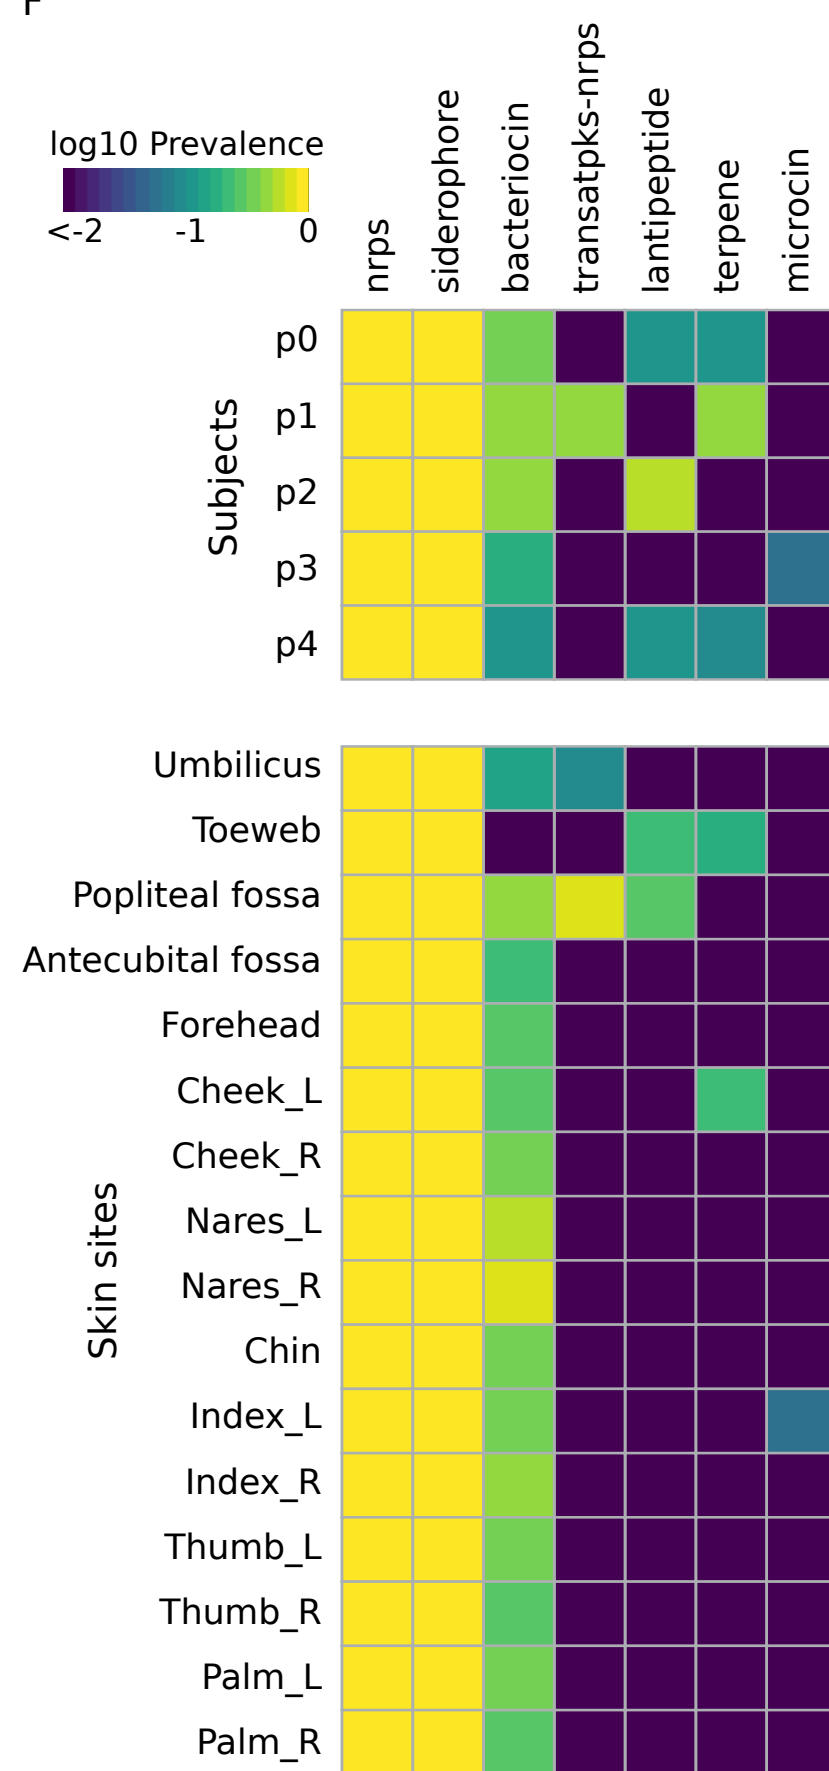

G

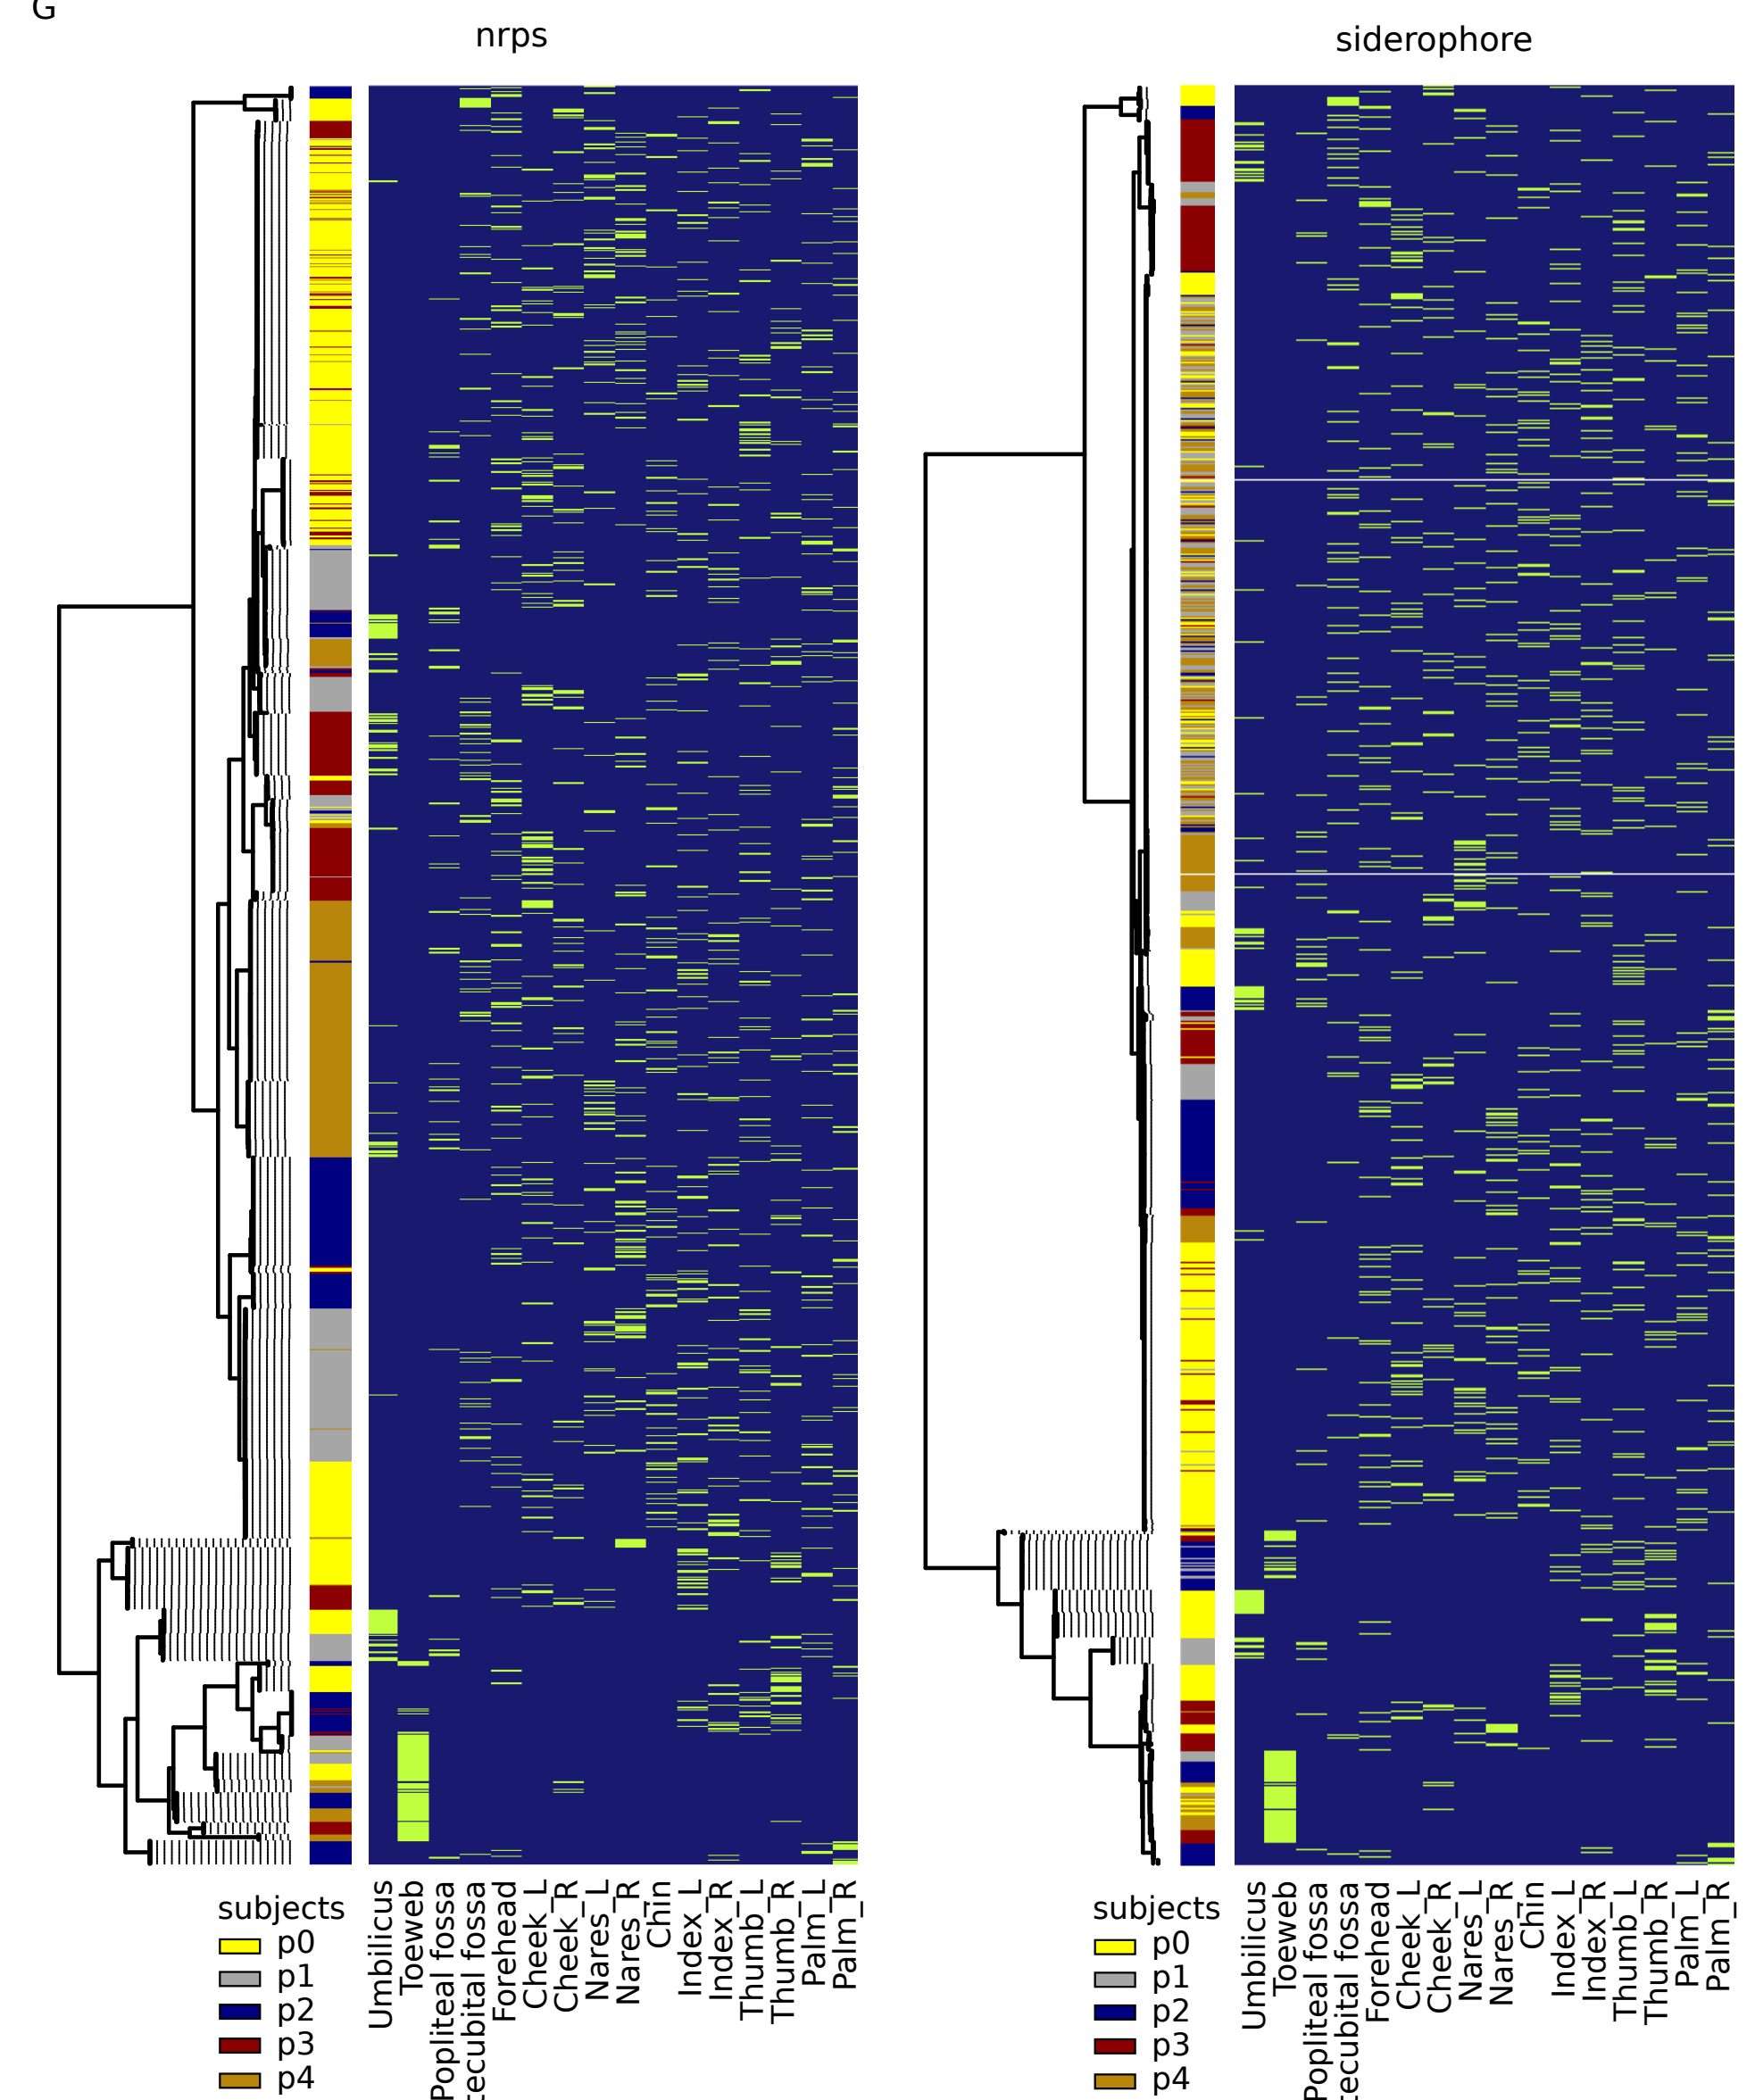

J

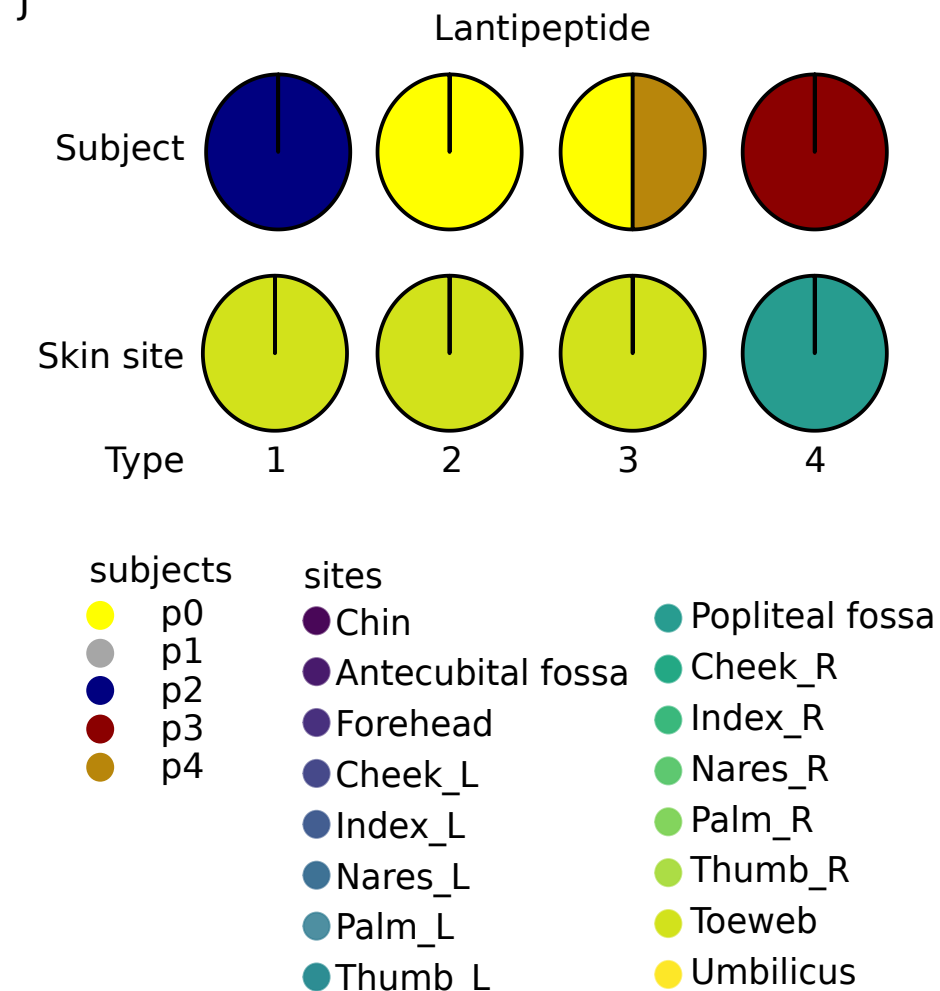

Supplement: NIHMS1569198-supplement-4.pdf [file NIHMS1569198-supplement-4.pdf]

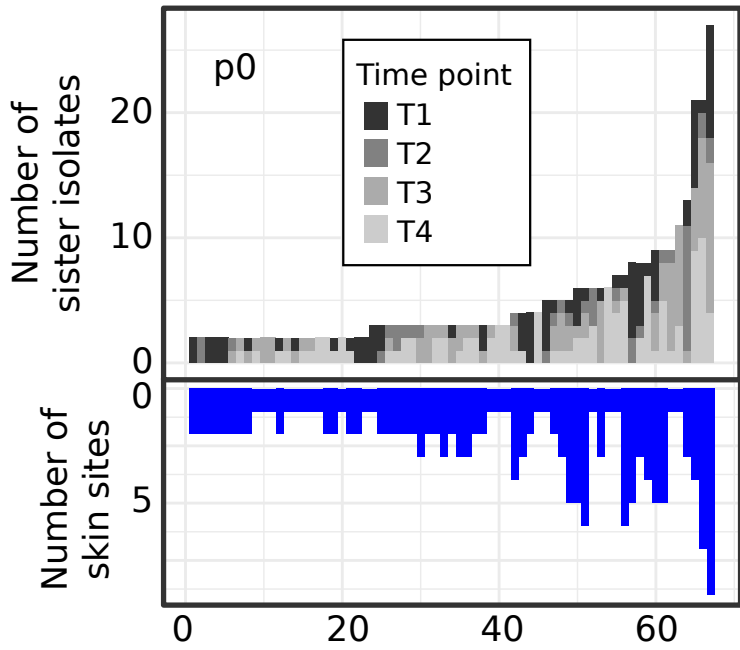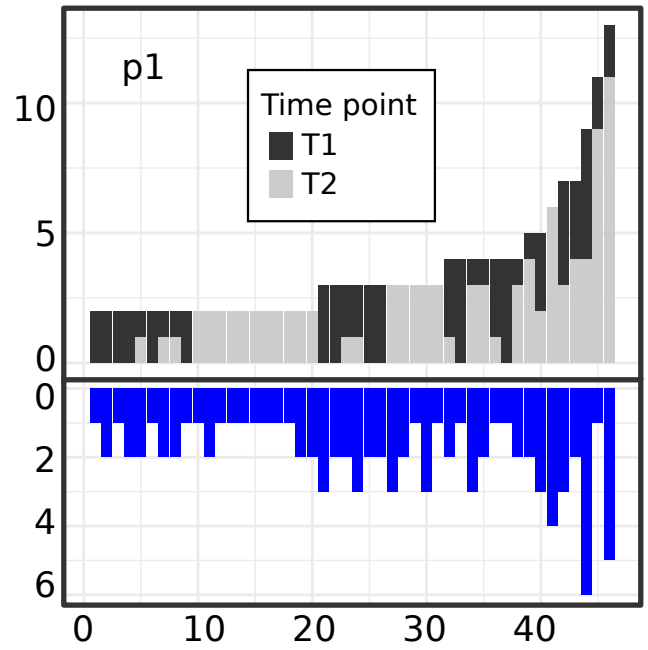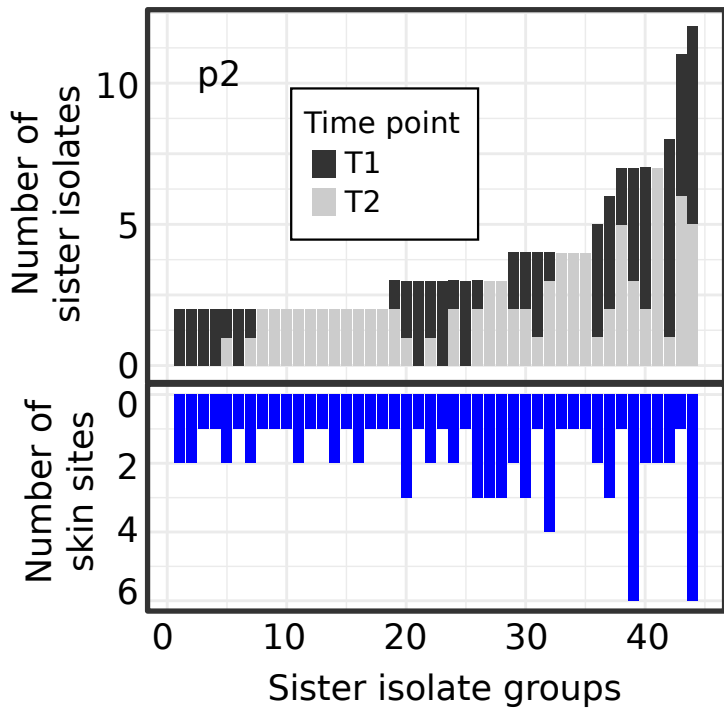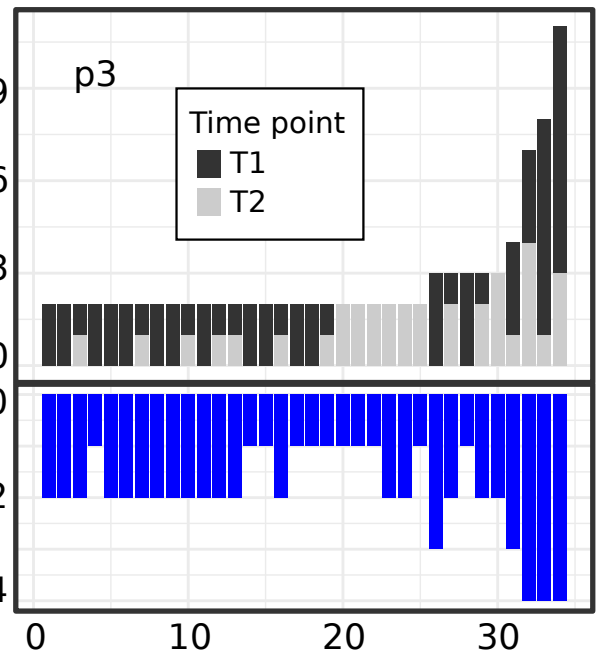

\*Segments with different gray colors represent different time points

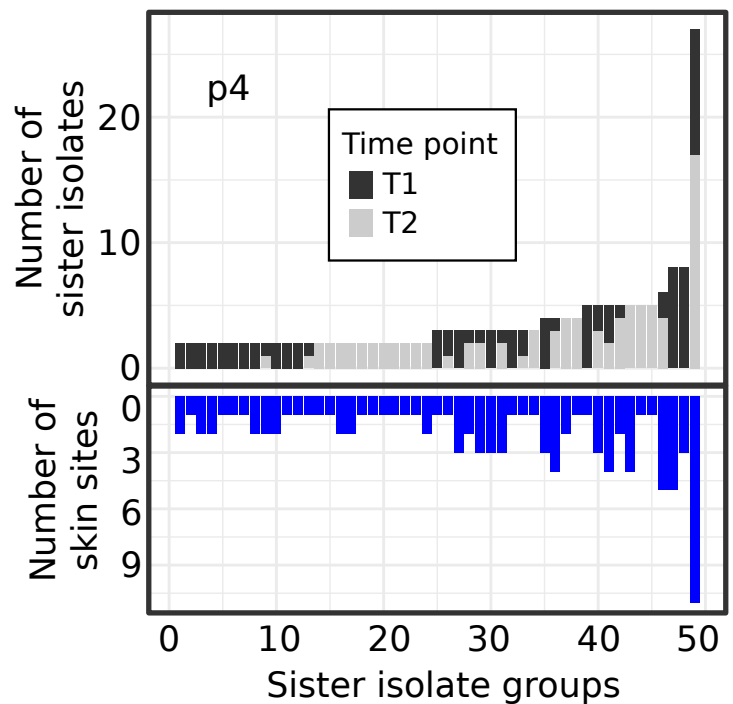

Supplement: NIHMS1569198-supplement-5.pdf [file NIHMS1569198-supplement-5.pdf]

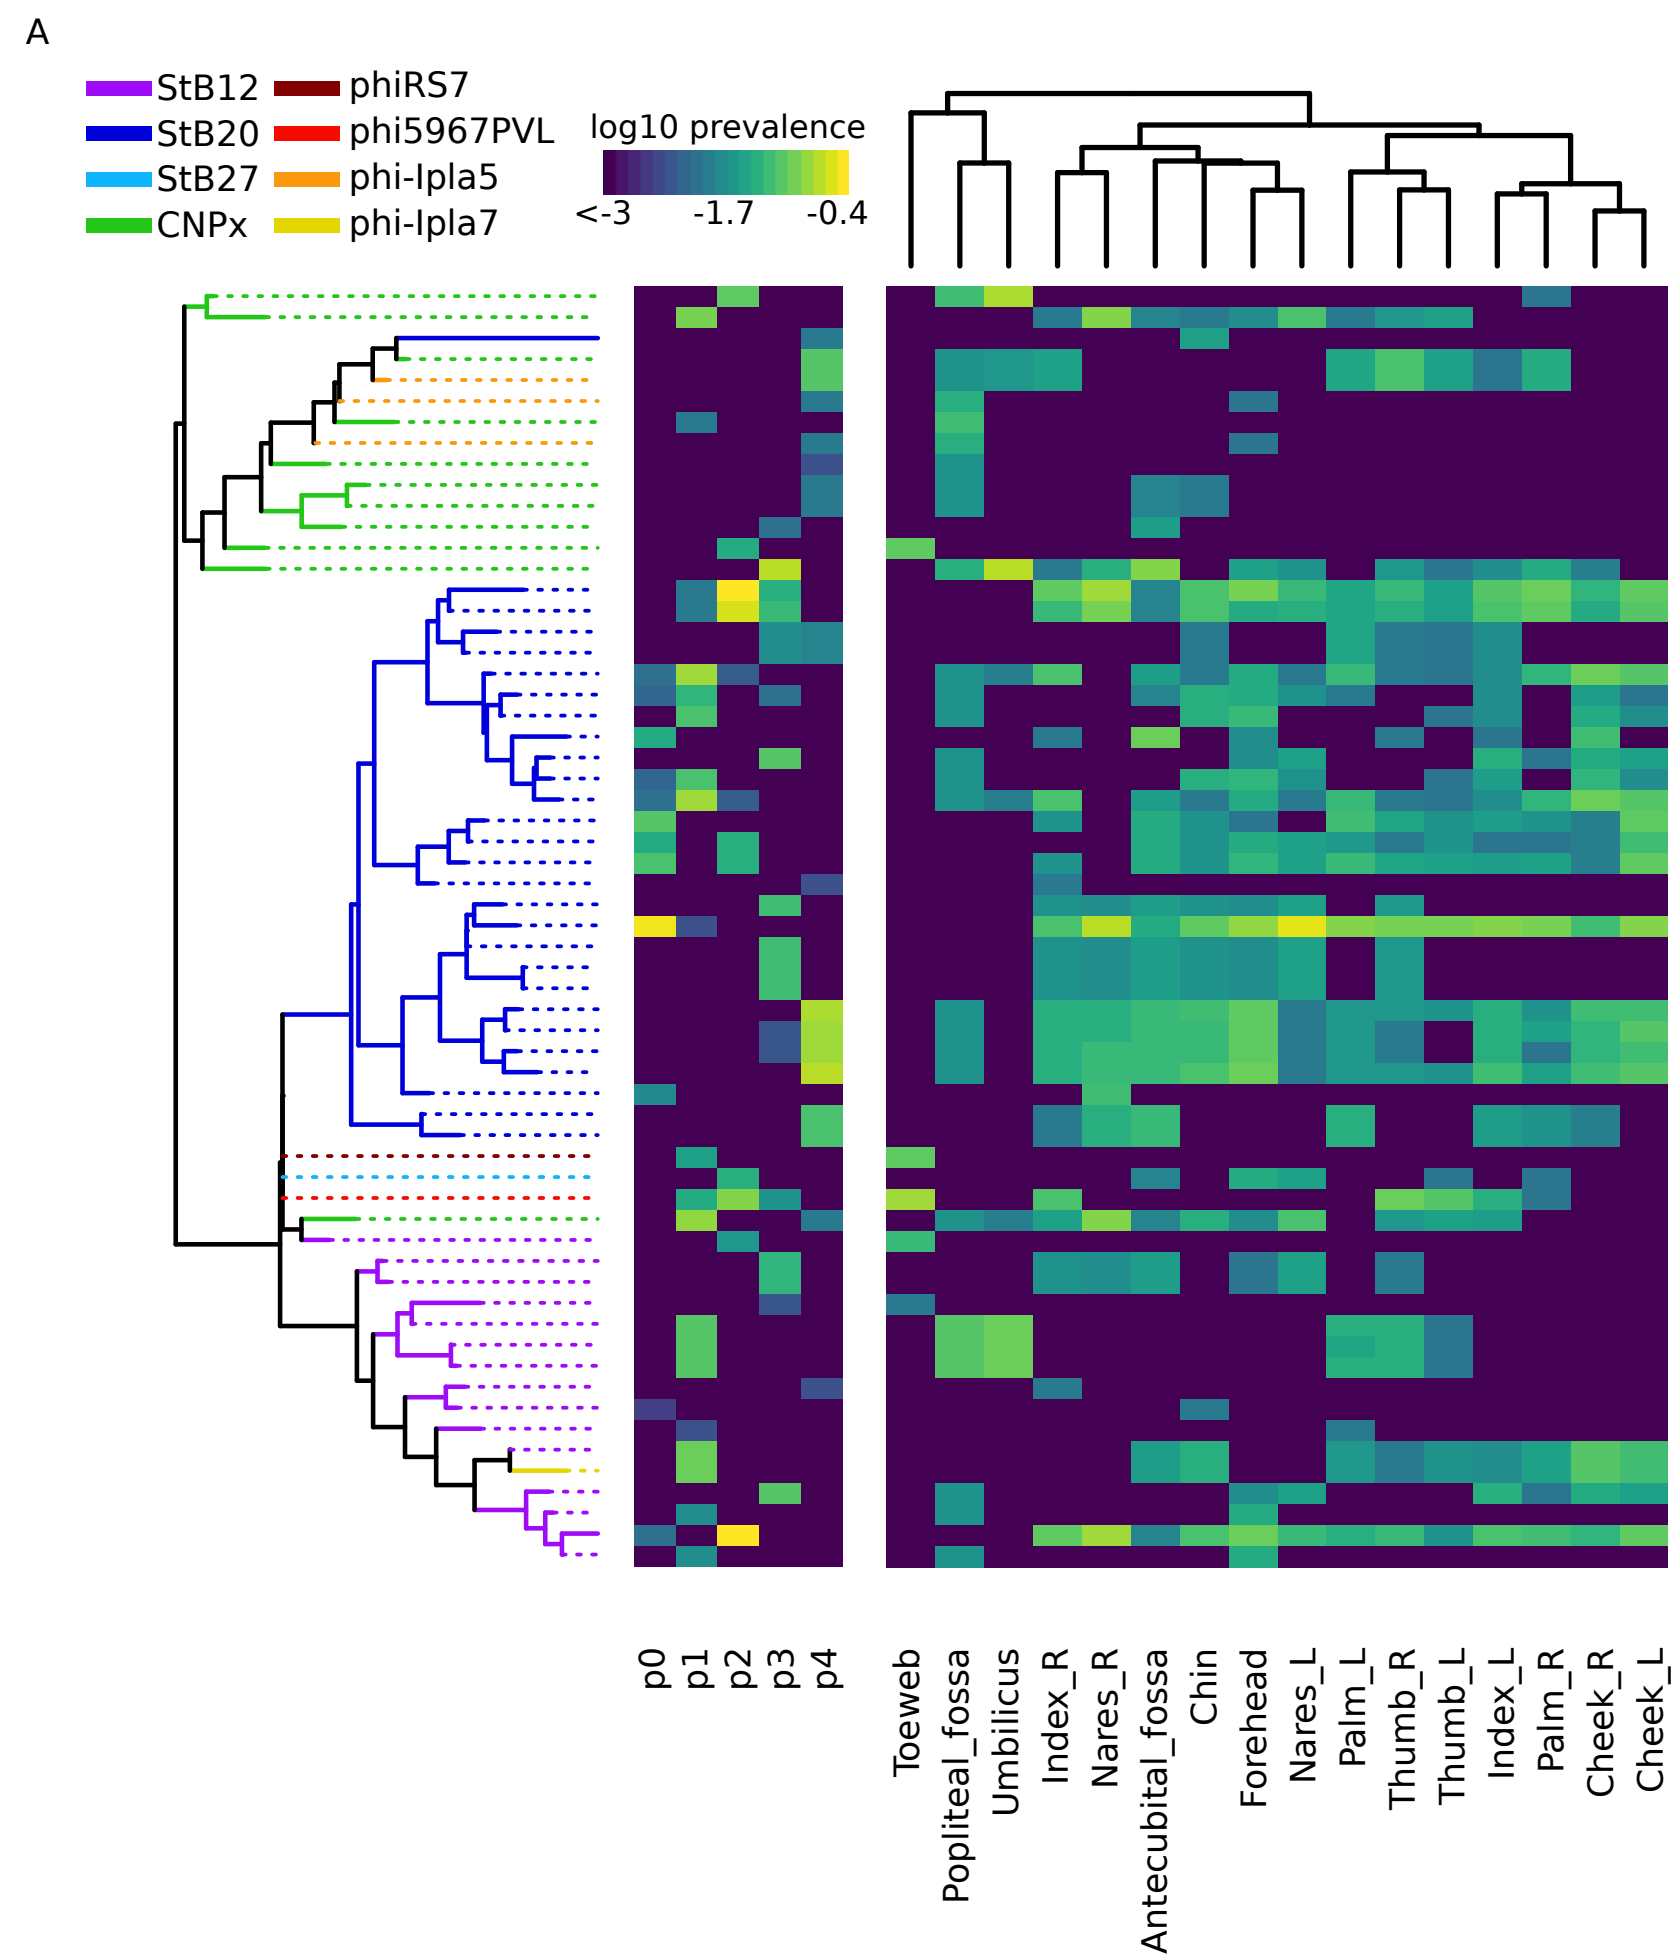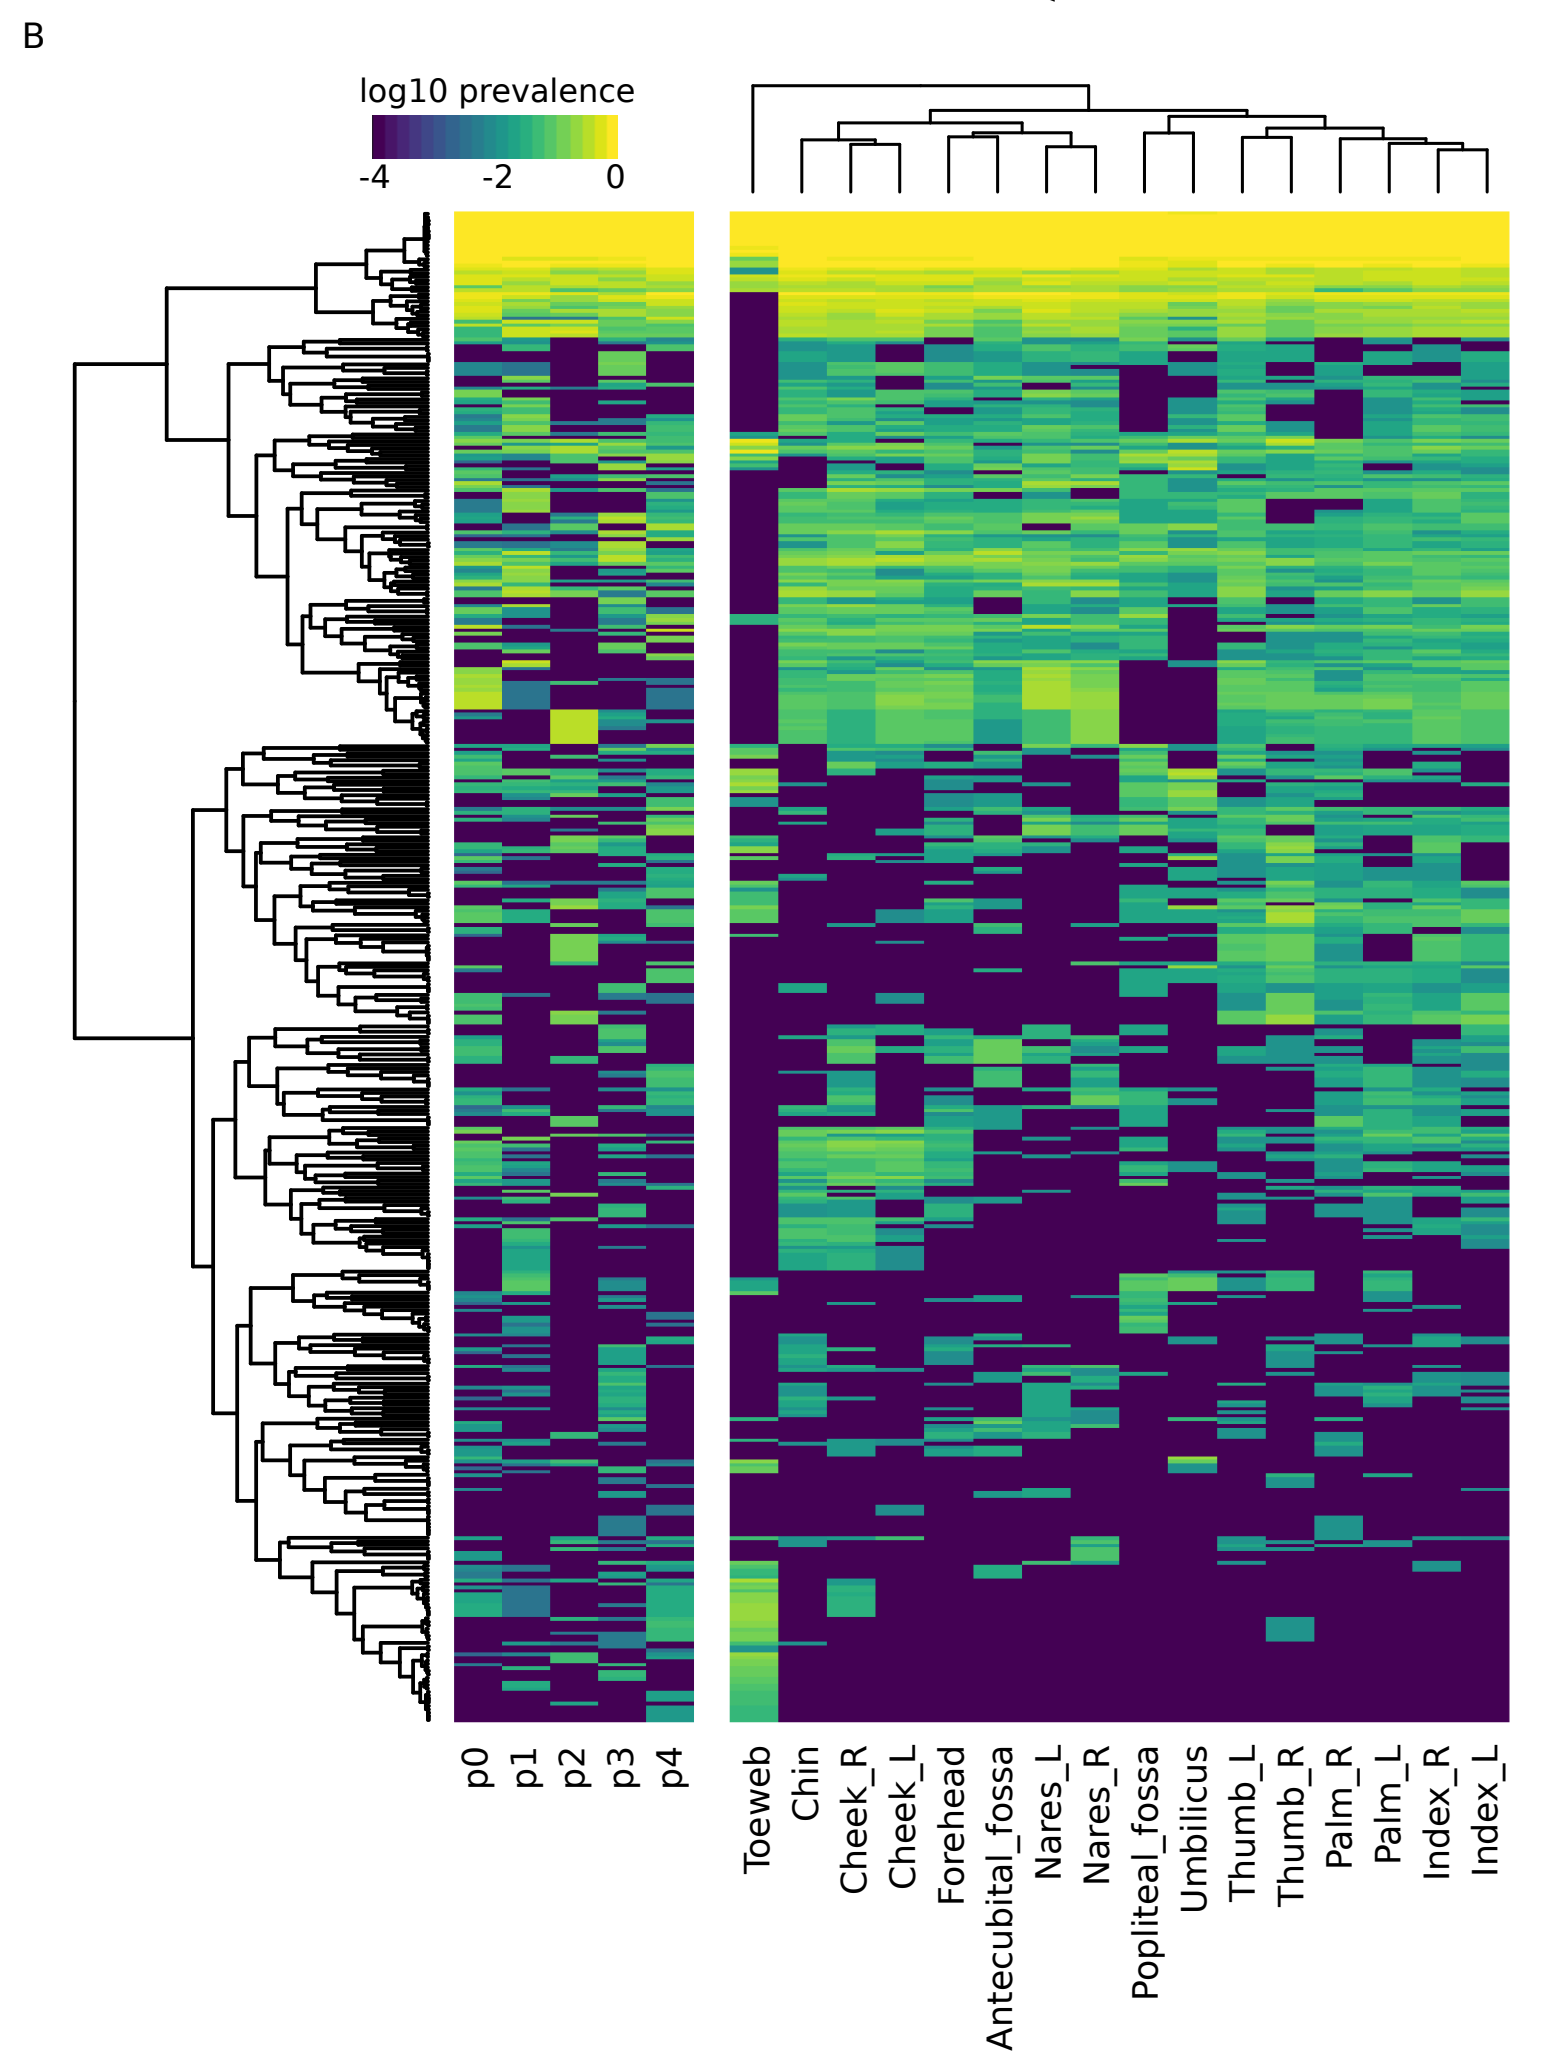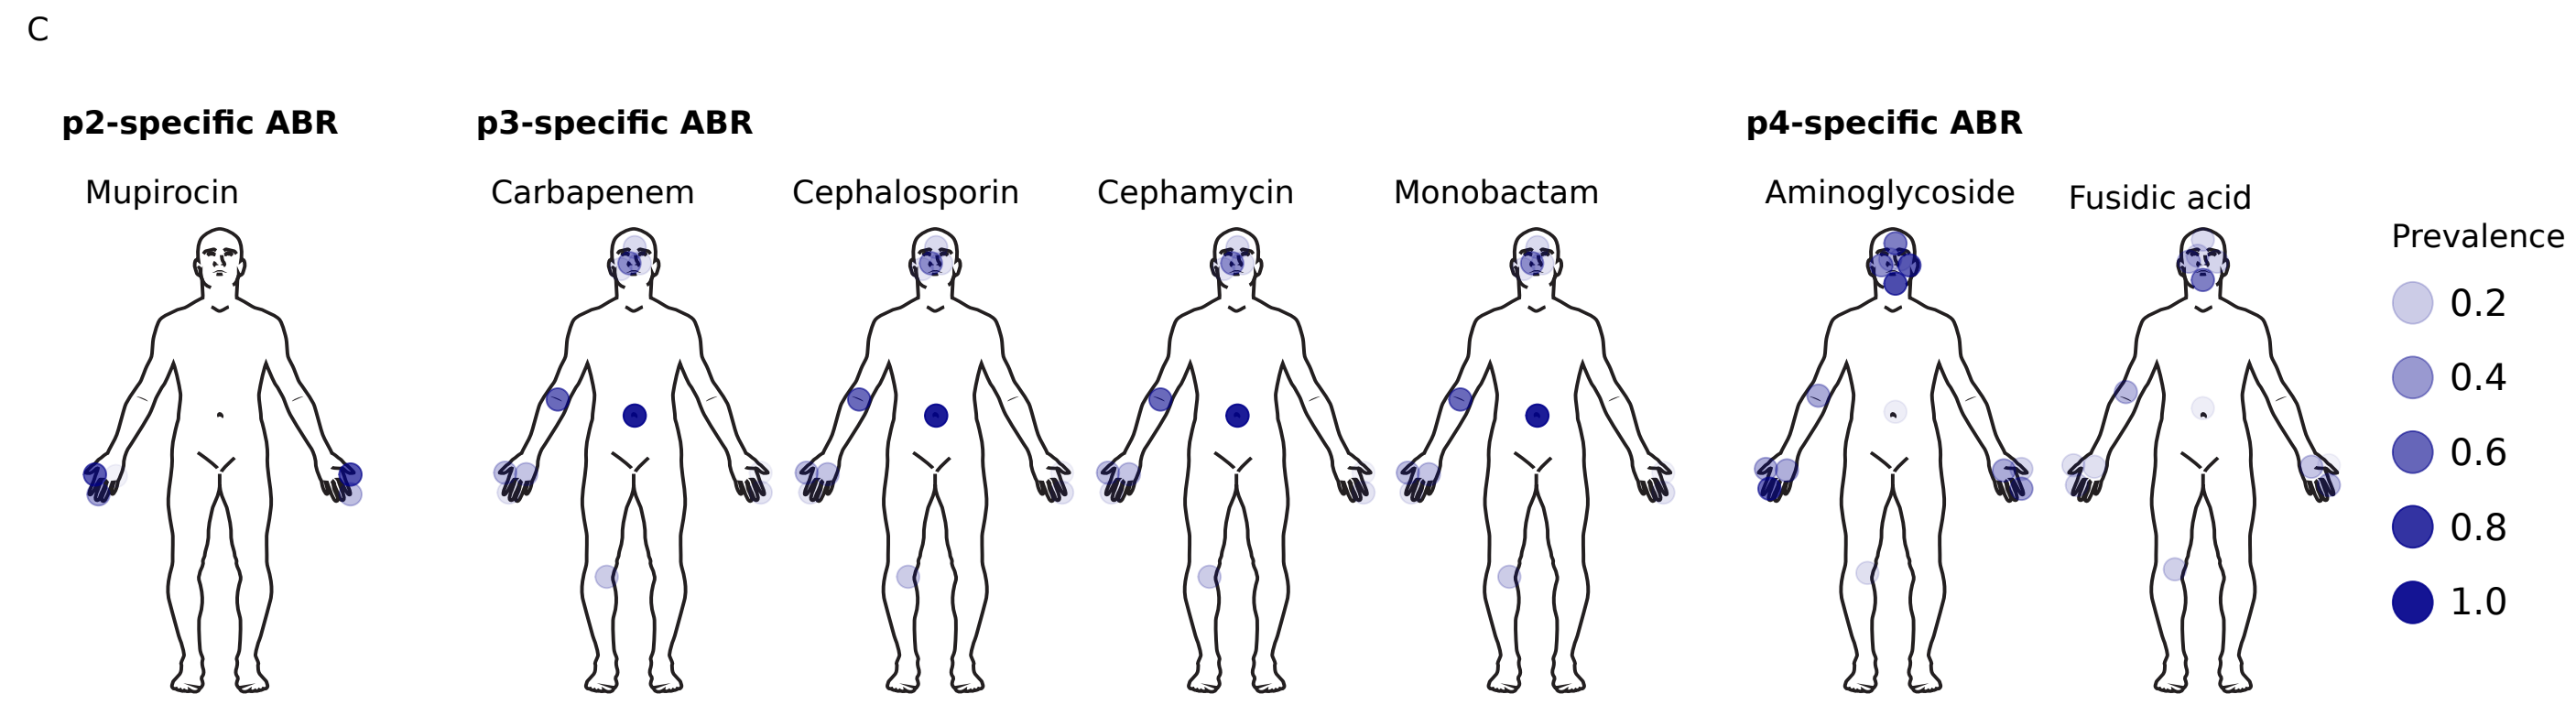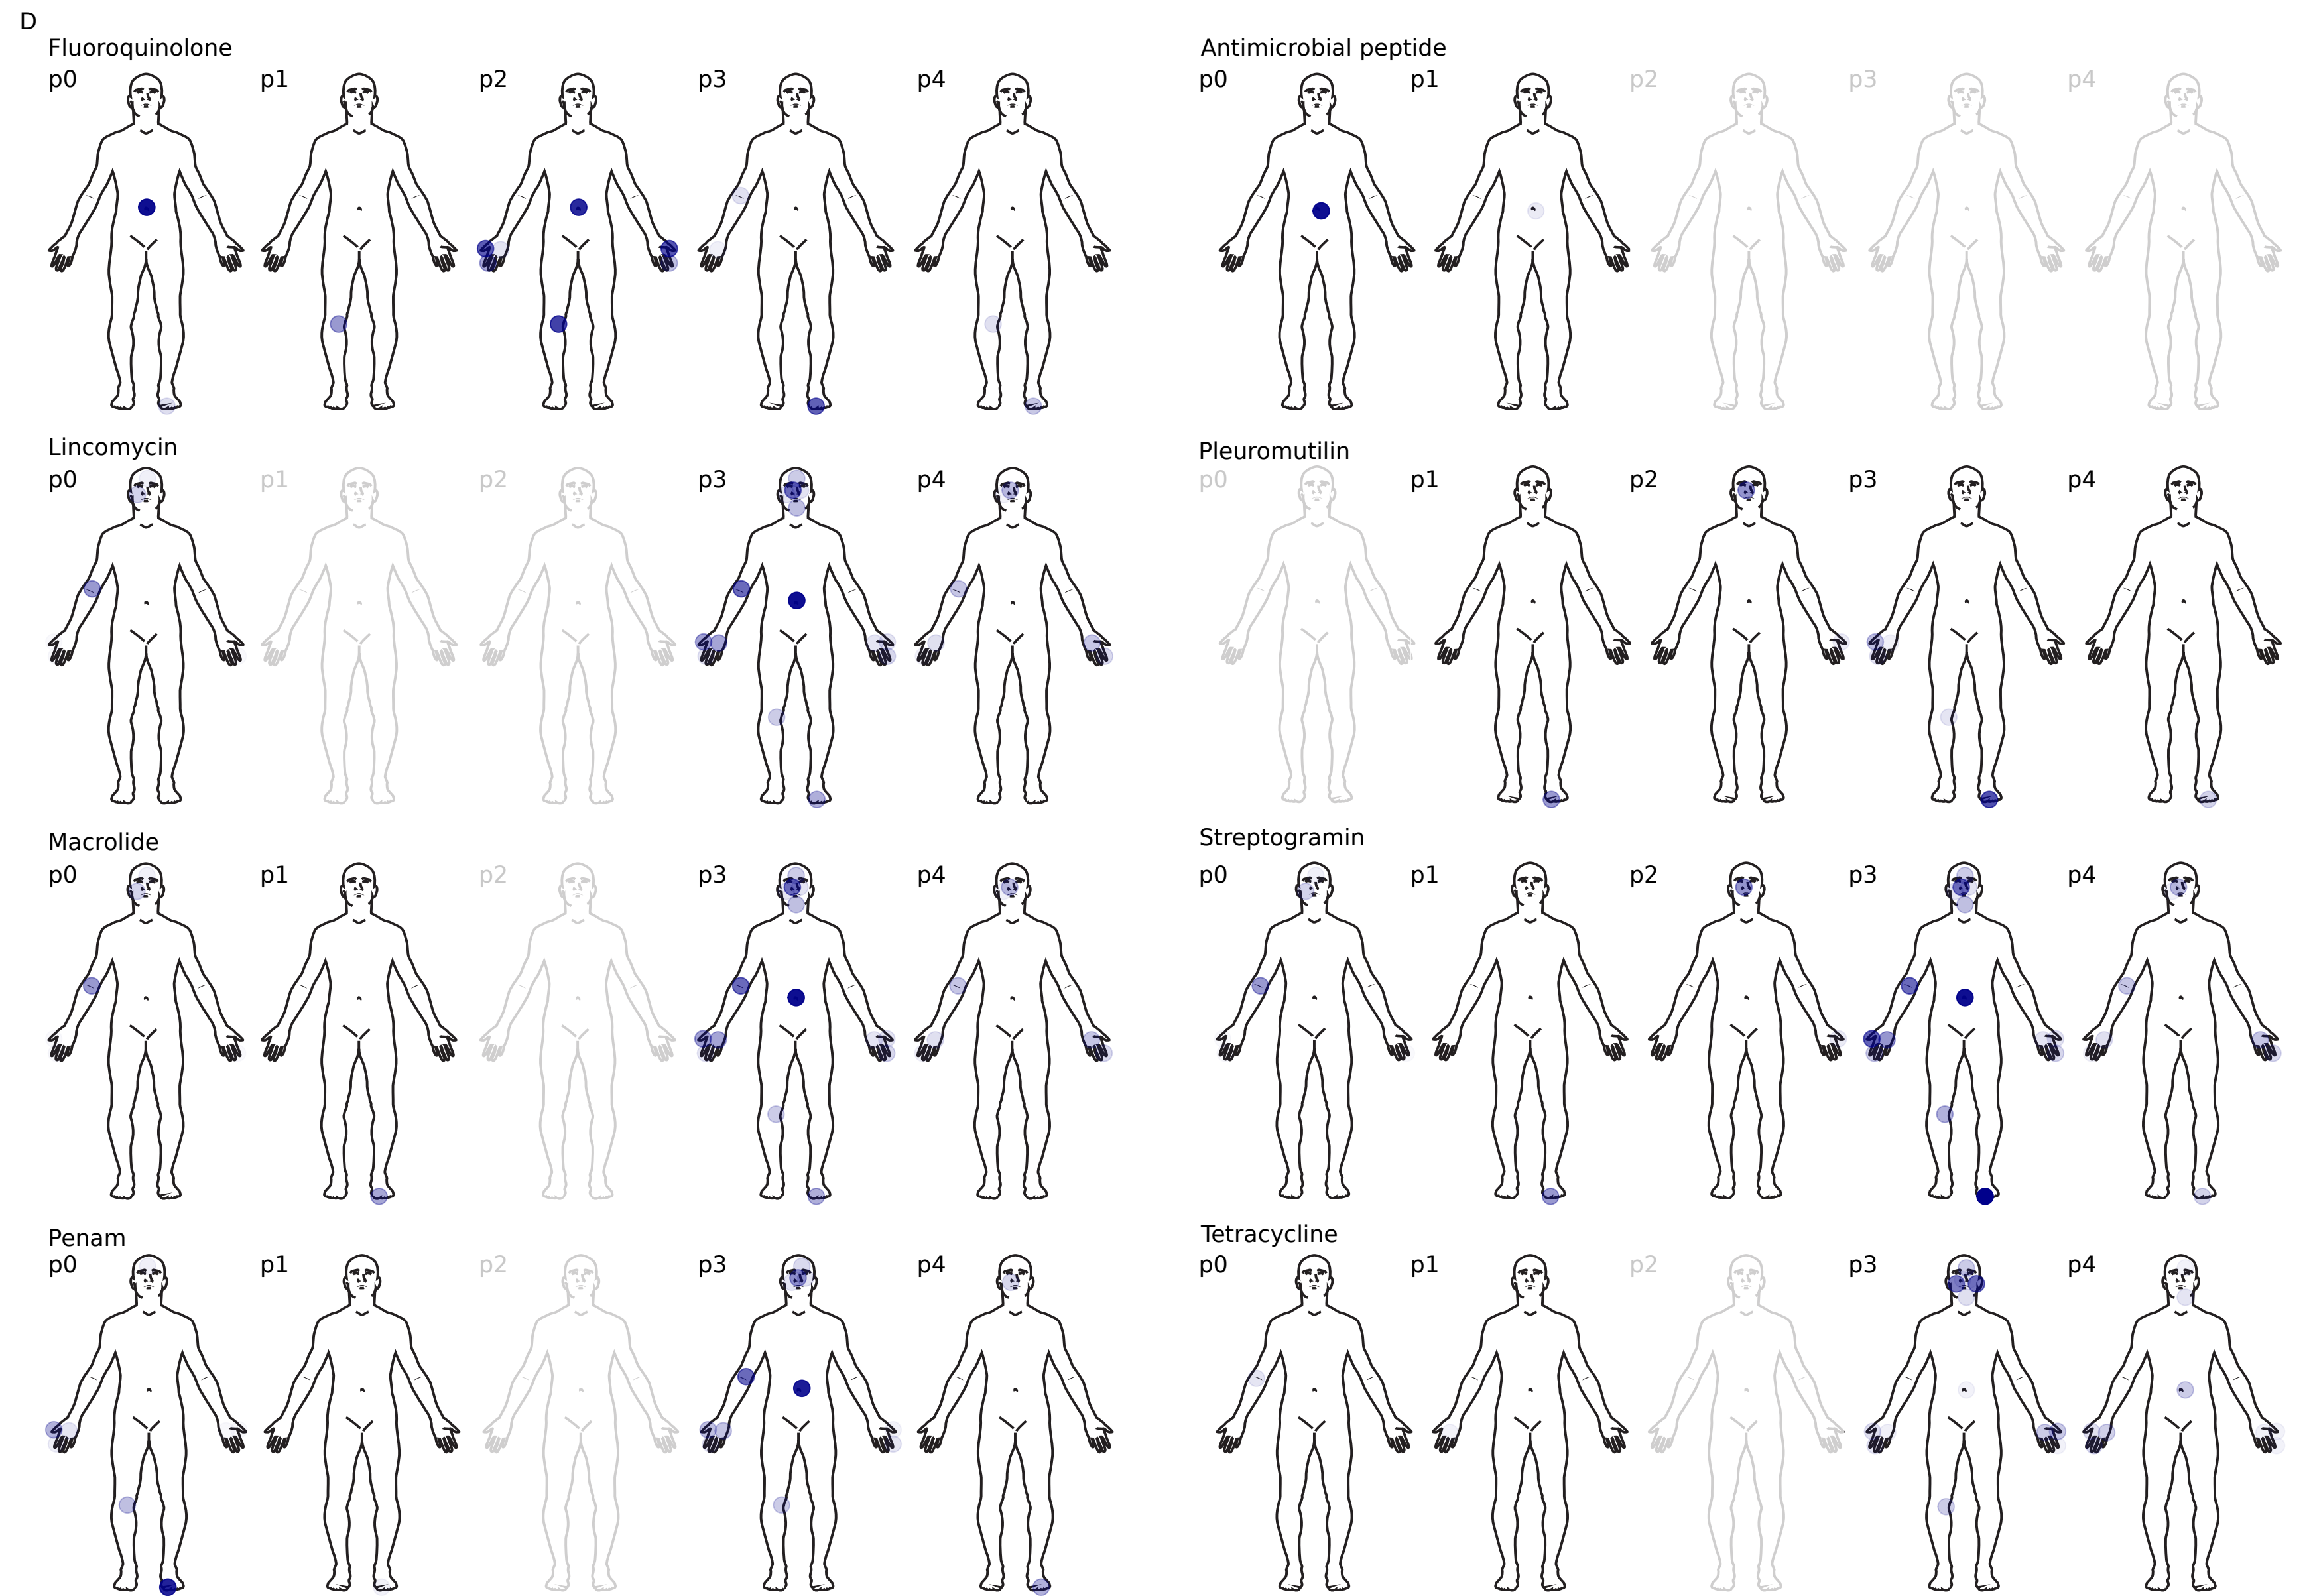

Supplement: NIHMS1569198-supplement-6.pdf [file NIHMS1569198-supplement-6.pdf]

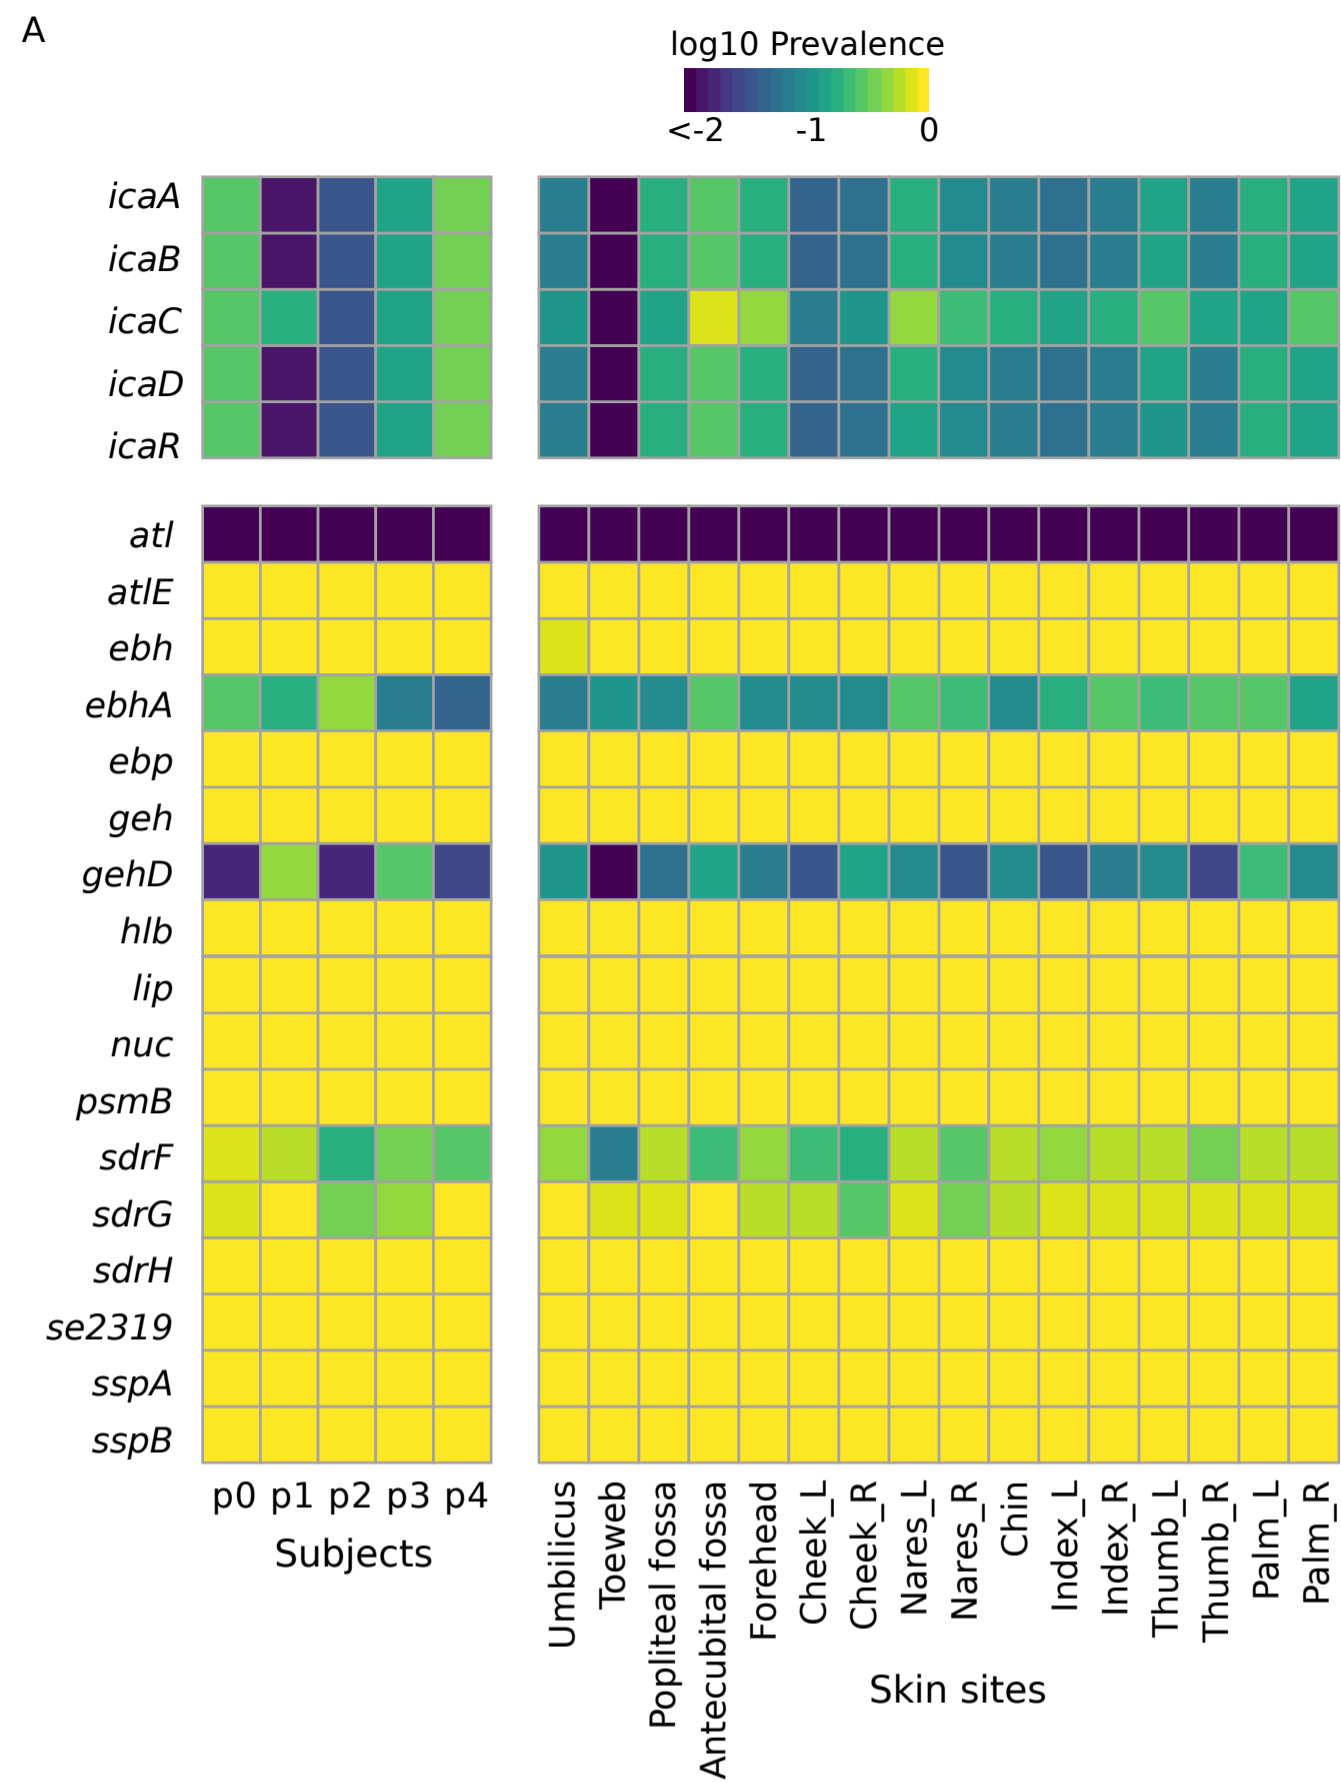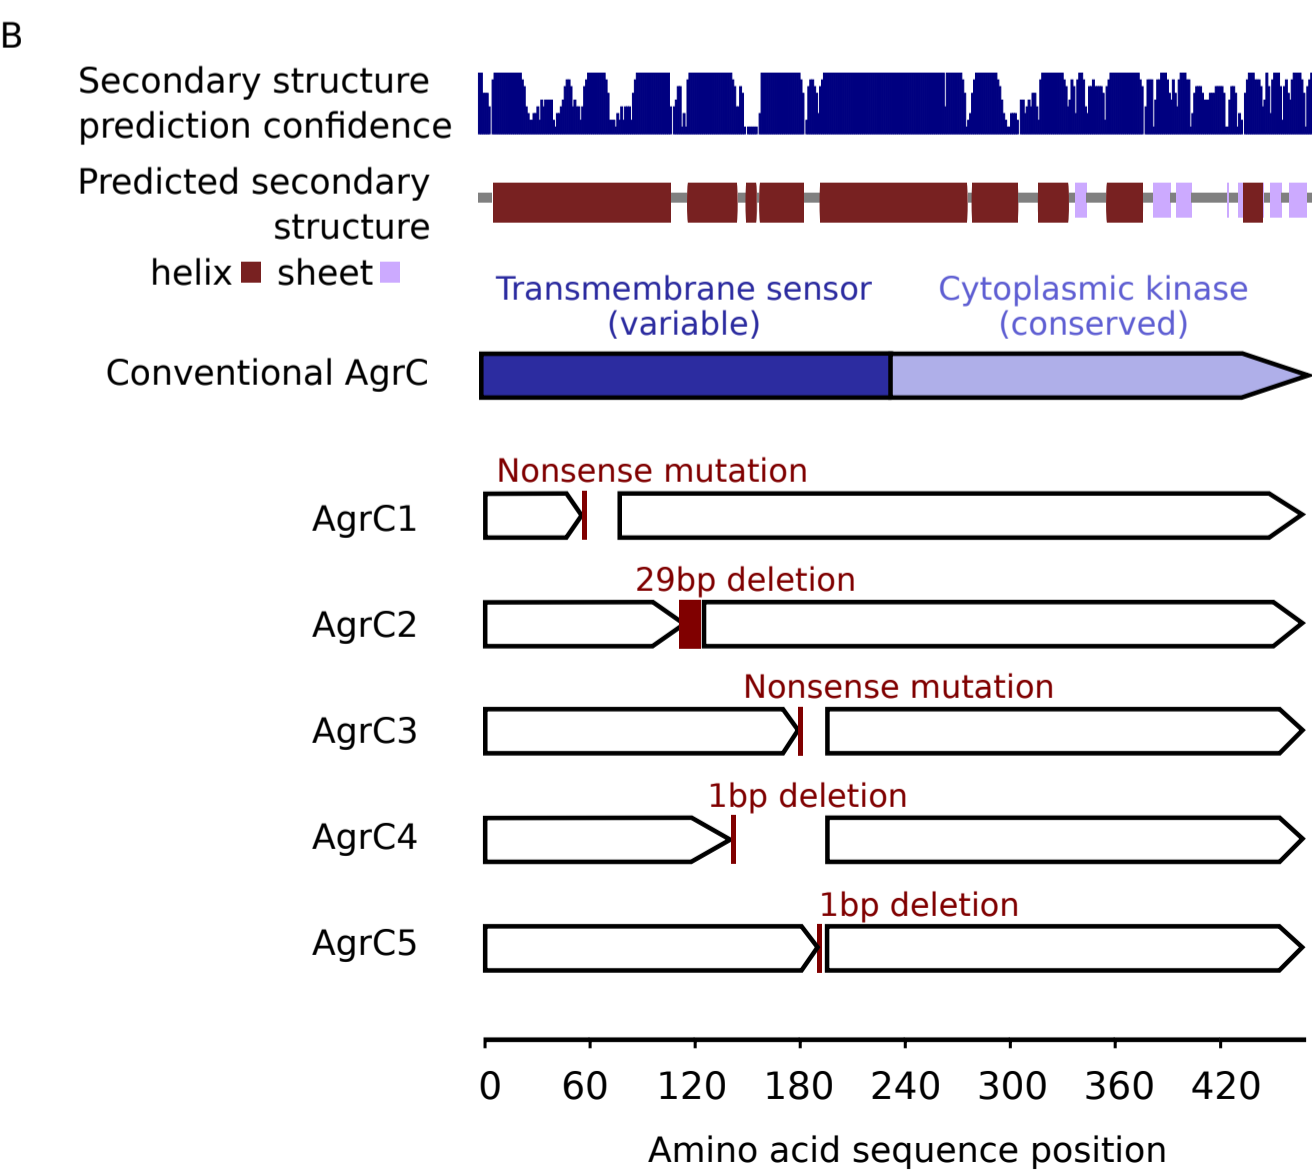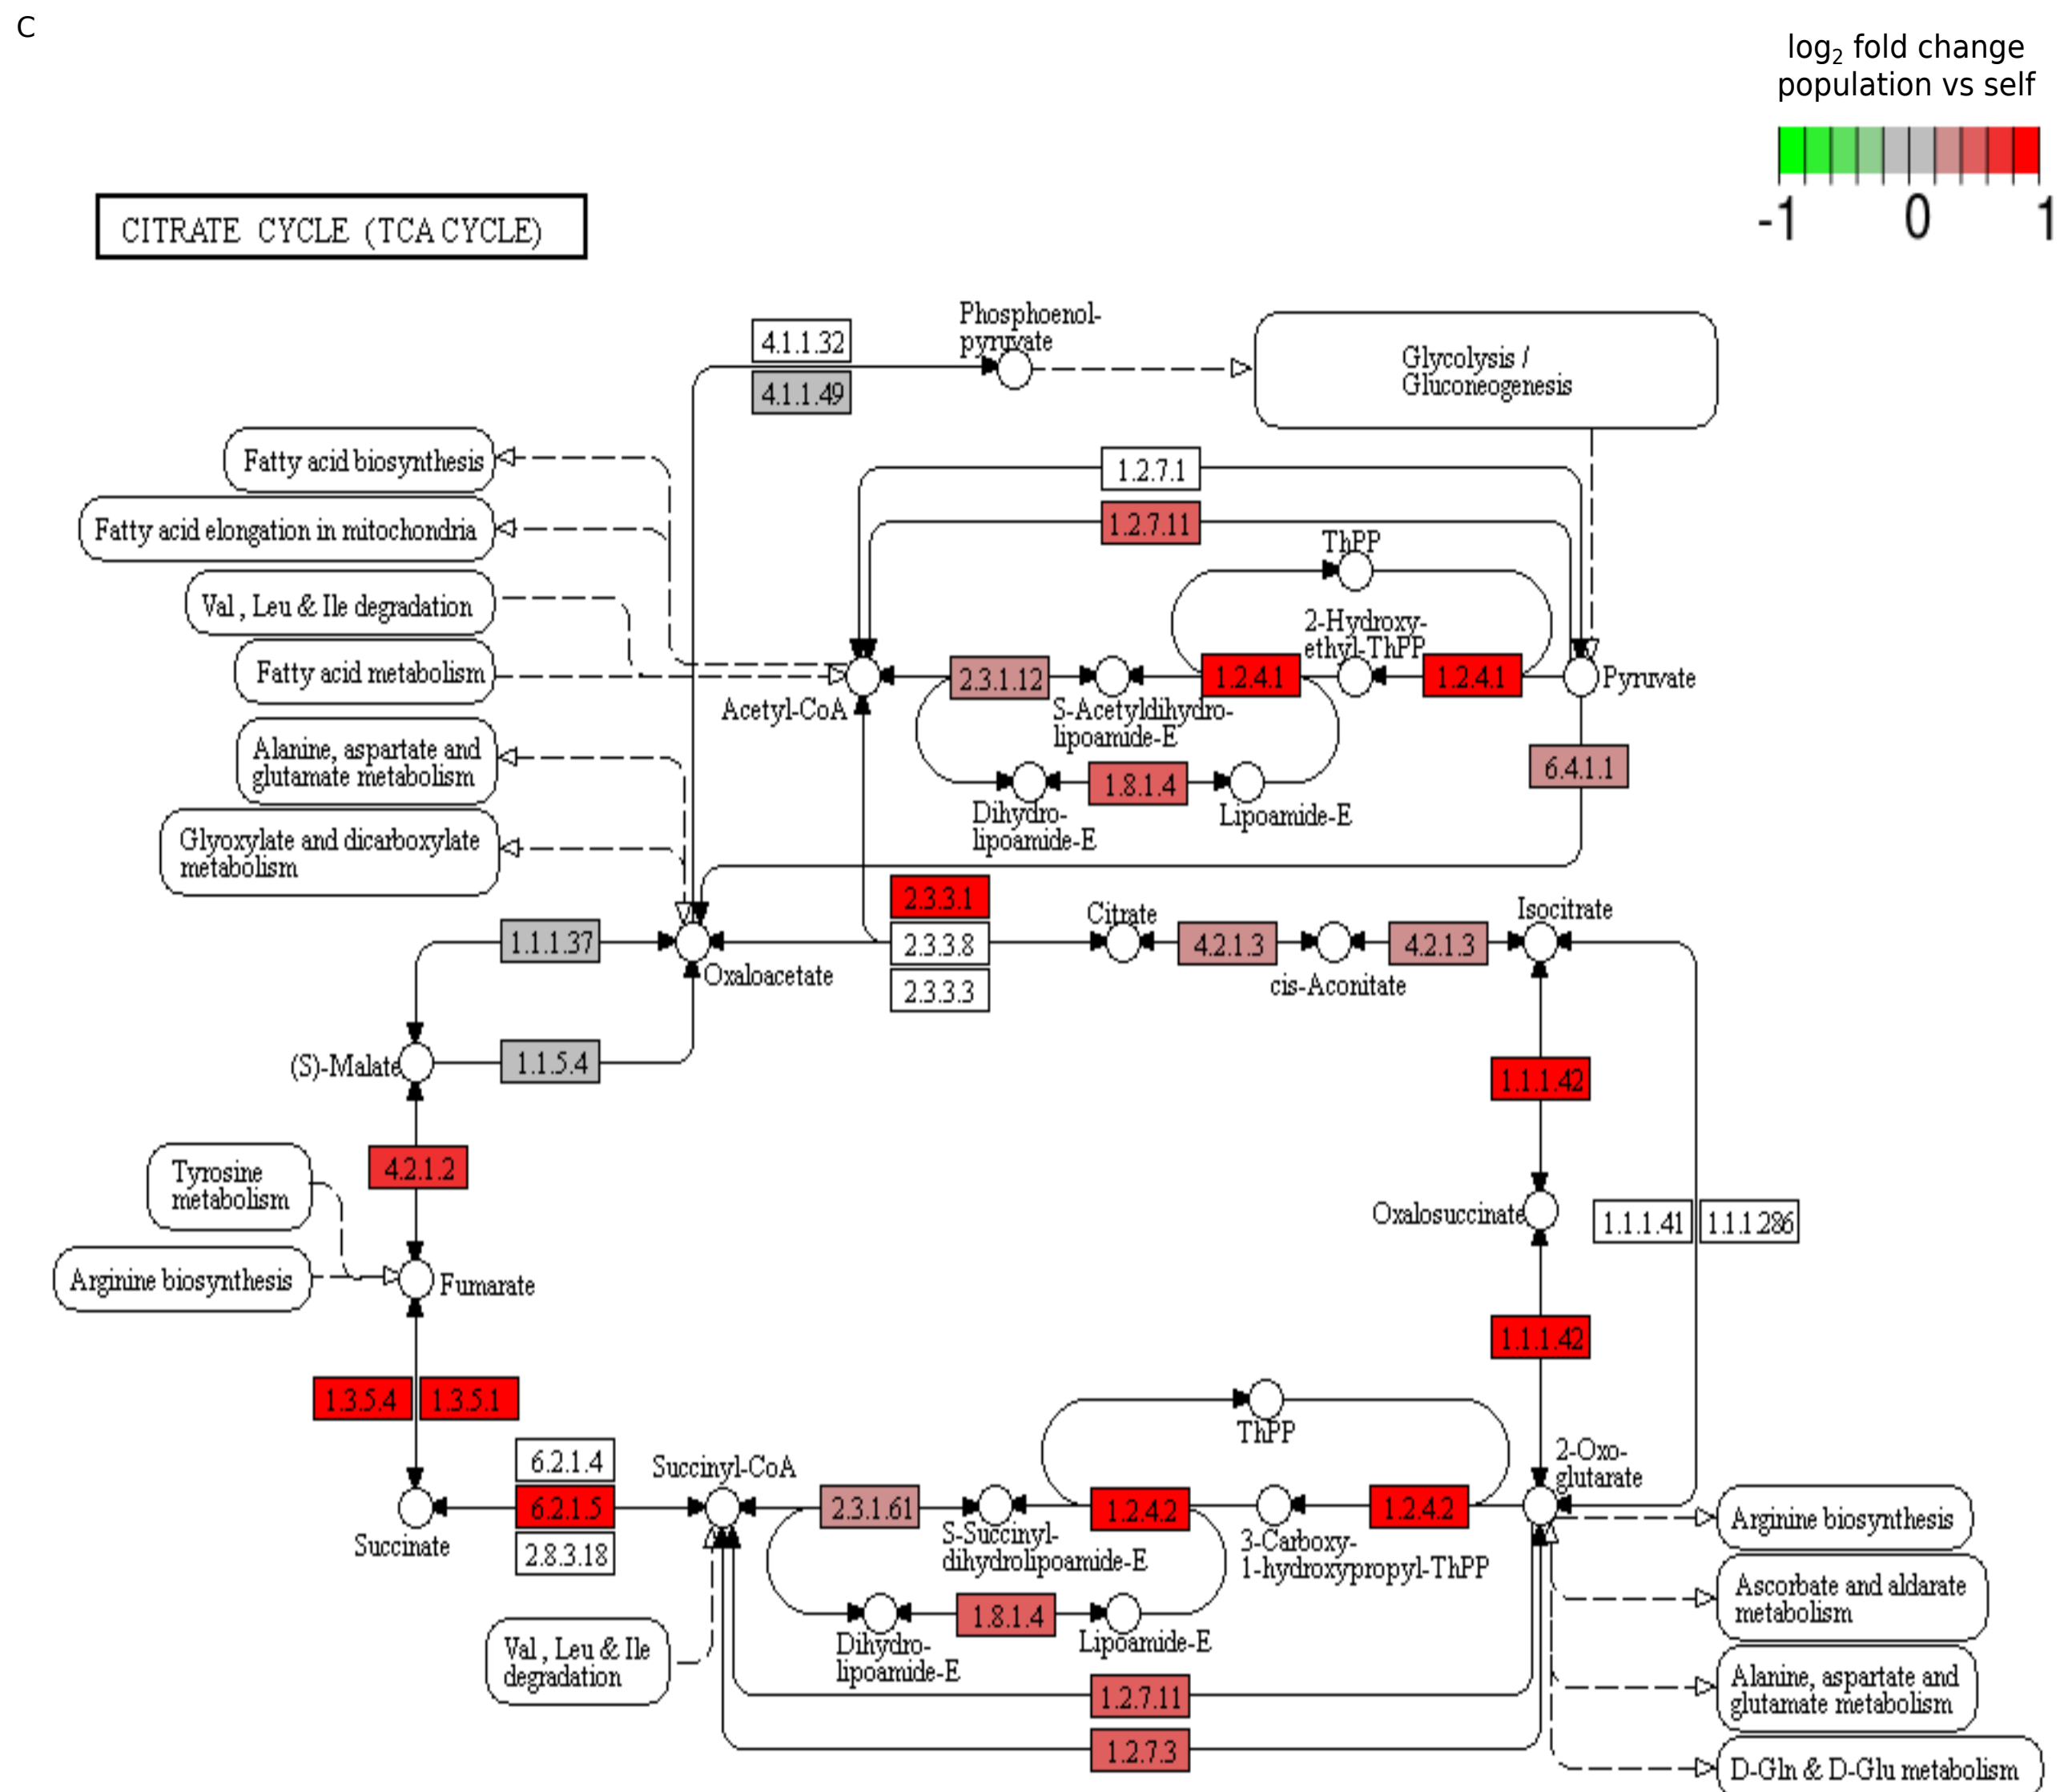

Supplement: NIHMS1569198-supplement-7.pdf [file NIHMS1569198-supplement-7.pdf]

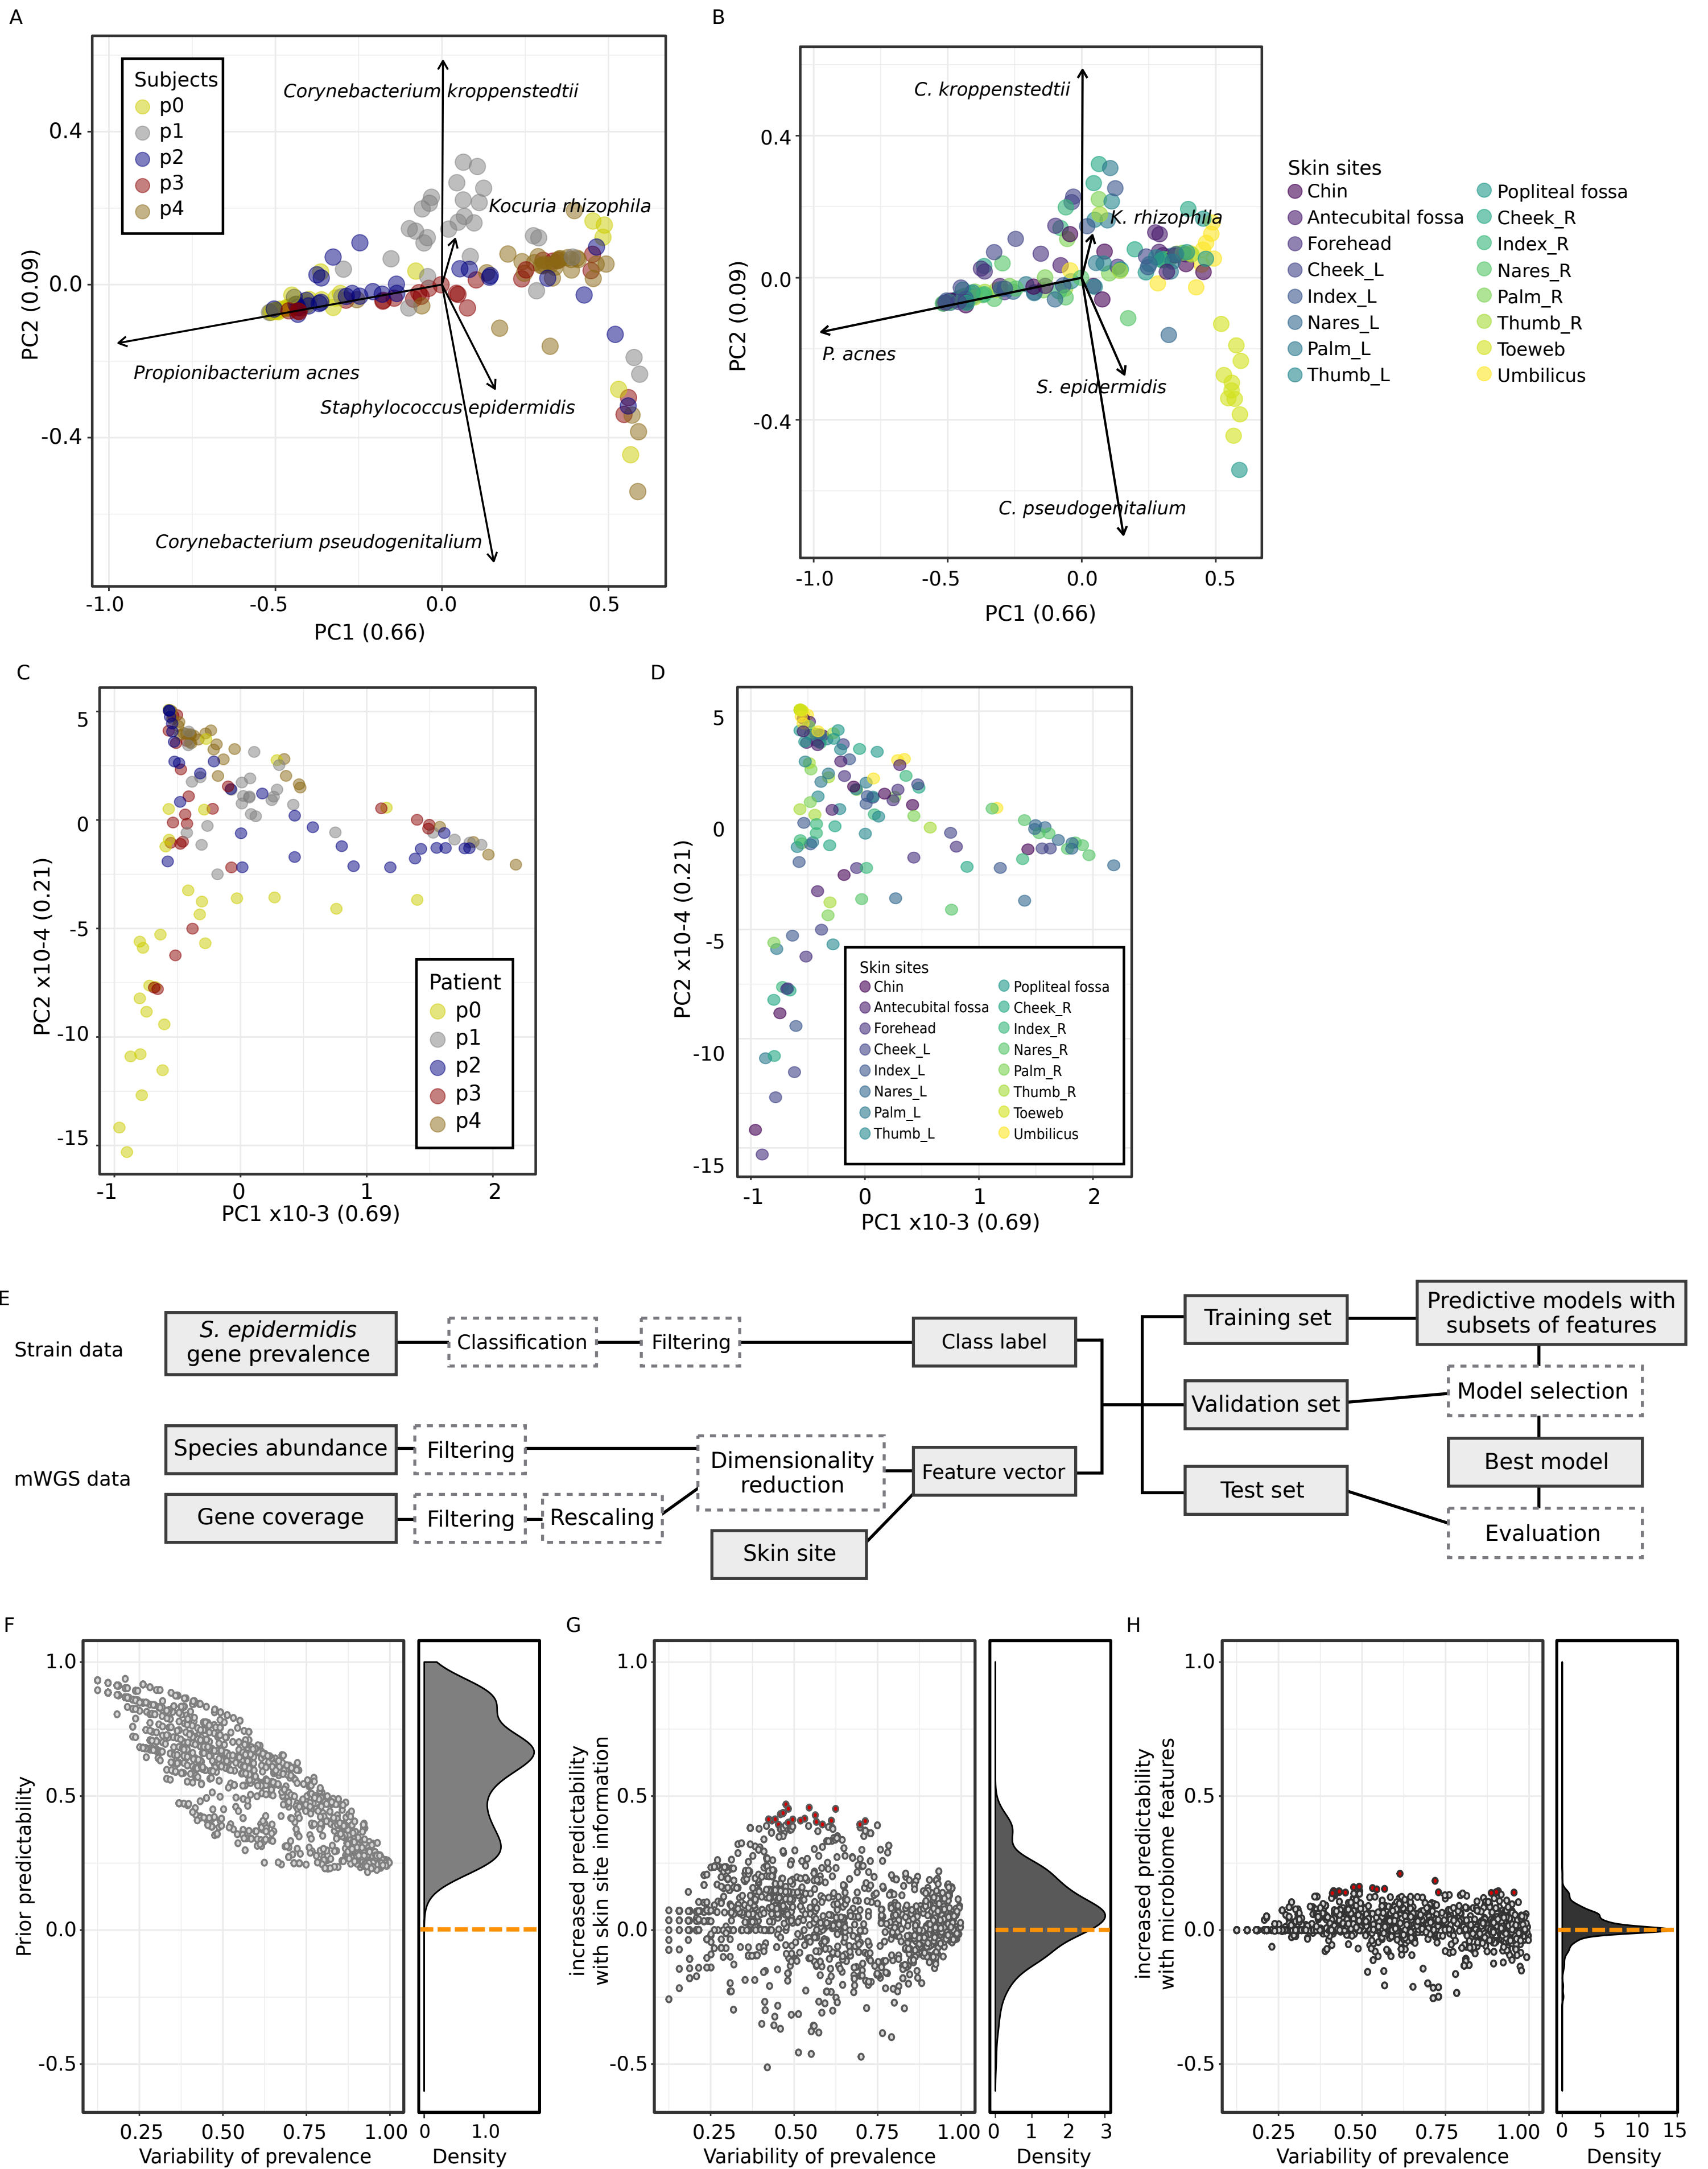

Supplement: NIHMS1569198-supplement-8.pdf [file NIHMS1569198-supplement-8.pdf]
